# Supplementary material
Source: publisher site journal article supplement (https://www.spandidos-publications.com/8017/downloadSupplementary)
Supplement: Supplementary file 1 [file downloadSupplementary]

## Sheet: Supplemental Table S1
Table SI. List of positively selected genes identified by MAGeCK analysis.
id	pos|score	pos|p-value	pos|fdr	pos|rank	pos|lfc	pos|goodsgrna
JUN	2.77e-06	1.71e-05	0.371287	1	0.86857	6
UBE2N	2.31e-05	9.39e-05	0.915017	3	-0.38718	2
DNAJB1	1.62e-05	0.00013001	0.915017	2	0.92266	5
GRK7	7.64e-05	0.00022368	0.915017	8	0.58	4
TMEM26	3.57e-05	0.00030868	0.915017	4	0.46791	6
SLIT3	4.07e-05	0.00035894	0.915017	5	0.78309	5
FGFBP2	6.89e-05	0.00037859	0.915017	6	0.68356	5
PSMD2	0.00014834	0.00043114	0.915017	16	0.31555	4
CLDN1	0.00014844	0.00043891	0.915017	17	-0.55316	2
hsa-mir-6803	0.00037459	0.00058468	0.915017	38	0.42692	2
hsa-mir-130b	0.00065726	0.00058971	0.915017	69	0.25413	2
hsa-mir-4759	0.00040233	0.00059885	0.915017	40	0.36664	3
hsa-mir-6874	0.00019014	0.00068019	0.915017	21	1.8705	3
CD70	7.59e-05	0.00070441	0.915017	7	0.56187	6
hsa-mir-3919	0.00044972	0.00071309	0.915017	45	1.8021	3
CAPN11	0.00011562	0.00071674	0.915017	12	-0.23334	2
CCDC64B	7.92e-05	0.00073822	0.915017	9	0.56391	6
C16orf86	8.33e-05	0.00076016	0.915017	10	-0.14314	1
MAPK14	9.04e-05	0.00082367	0.939291	11	0.71005	4
ZNF706	0.00026527	0.00094979	0.959271	28	0.4767	4
hsa-mir-6770-3	0.0047824	0.00097401	0.959271	356	1.2383	1
SPIDR	0.004972	0.00097401	0.959271	371	0.65163	1
ARSG	0.00017759	0.0011883	0.996883	19	0.14282	4
ITGB6	0.00012149	0.0011947	0.996883	13	0.39267	6
XXYLT1	0.00018337	0.0012313	0.996883	20	0.42582	5
ELOVL4	0.00012531	0.0012418	0.996883	14	0.51905	6
SERPINE2	0.00012758	0.0012423	0.996883	15	0.42756	6
MDFIC	0.00019645	0.0012902	0.998409	23	0.47273	4
NLE1	0.00020811	0.001378	1	24	-0.44362	2
hsa-mir-548t	0.00077682	0.0015717	1	78	0.23245	2
UBA6	0.00017265	0.0016014	1	18	0.61249	5
TRERF1	0.00040695	0.0017088	1	42	-0.50476	2
THAP4	0.00019424	0.0018331	1	22	-0.37052	2
ASZ1	0.0002742	0.0019058	1	29	0.39644	4
C7orf62	0.00020849	0.0019282	1	25	0.11719	3
BCHE	0.00023211	0.0019926	1	26	0.8444	5
ELN	0.0003006	0.0021055	1	30	0.0062274	3
FAM154B	0.00030514	0.0021214	1	31	-0.36874	2
CLDN25	0.00026158	0.0022119	1	27	0.80975	5
TRIM45	0.00032241	0.0022512	1	34	0.6965	5
hsa-mir-3140	0.0022801	0.0024121	1	185	-0.0019283	2
ZNF41	0.00034142	0.0024244	1	35	0.53344	5
GLI1	0.00030522	0.0024272	1	32	0.31416	3
ZDHHC1	0.00034684	0.0024646	1	36	-0.10529	3
hsa-mir-1268a	0.0025422	0.0025181	1	205	-0.85891	1
GADD45A	0.00037321	0.0025912	1	37	0.38156	5
ZBTB44	0.00031822	0.0026268	1	33	0.44001	4
hsa-mir-106a	0.00061892	0.0026575	1	67	0.96219	4
NKX2-2	0.00038718	0.0027598	1	39	0.50202	5
PIP	0.0004047	0.0028572	1	41	0.3586	5
PRR12	0.00042928	0.0032739	1	43	0.51541	5
hsa-mir-208a	0.0030964	0.0032794	1	246	-0.27753	2
SLITRK6	0.00044558	0.0033022	1	44	0.60936	4
PPP1R37	0.00046233	0.0033753	1	46	0.55161	4
ZNF799	0.0032348	0.0035028	1	255	1.5767	2
hsa-mir-638	0.0013648	0.003533	1	110	0.54781	2
TGFBR1	0.00049899	0.003554	1	50	0.39356	5
C1GALT1C1	0.00050804	0.0035897	1	53	0.43076	5
ITPKC	0.00050866	0.0035901	1	54	-0.57821	1
DTNA	0.00046289	0.0035988	1	47	0.46244	4
IRF6	0.00046407	0.0035988	1	48	0.48223	5
MANBA	0.00047167	0.0035993	1	49	0.25681	4
HELB	0.00052582	0.0037272	1	57	0.54096	4
ST8SIA2	0.00050439	0.0038643	1	51	0.59342	6
GPR52	0.00053885	0.0038821	1	60	0.2902	5
SLFN11	0.00050777	0.0038839	1	52	0.70522	5
ULBP3	0.0005111	0.0038839	1	55	0.29768	5
ARHGEF39	0.0005234	0.0039283	1	56	0.58869	4
hsa-mir-4771-2	0.0057675	0.0039561	1	417	2.7558	1
NCK1	0.00052715	0.0040073	1	58	0.088503	4
ANAPC16	0.00053528	0.0040713	1	59	0.35705	5
hsa-mir-380	0.00086449	0.0040814	1	84	0.9895	3
hsa-mir-6867	0.00088773	0.0040818	1	85	0.7007	3
IER3	0.0005577	0.0041892	1	61	0.81637	5
FIG4	0.00057801	0.0042568	1	62	-0.23173	3
MRPL17	0.00058939	0.0043592	1	63	0.74522	4
PRRG1	0.00060927	0.0044099	1	64	-0.62089	2
FBN2	0.00061221	0.0044099	1	66	0.32683	5
C6orf57	0.00061179	0.0044839	1	65	0.43022	5
ALDH16A1	0.00065406	0.0044949	1	68	0.55247	3
FFAR4	0.00093851	0.0045123	1	88	-0.21111	3
DYNAP	0.00066298	0.004536	1	71	0.025922	3
hsa-mir-374a	0.00094946	0.0045644	1	89	1.0591	3
NEK5	0.00065917	0.0047535	1	70	0.66814	4
CPT2	0.00066873	0.0048358	1	72	0.30741	5
NPAP1	0.00072417	0.0048463	1	74	0.5879	4
hsa-mir-7854	0.0010356	0.0048842	1	96	0.41833	2
TCEB3	0.00074379	0.0050126	1	76	0.57264	4
FAM19A4	0.00068963	0.0051045	1	73	0.41273	5
TMPRSS5	0.00074693	0.0051059	1	77	-0.091629	3
AGBL2	0.0011517	0.0051941	1	100	-0.11001	3
XYLB	0.00073886	0.0053046	1	75	0.71309	4
CAMK4	0.00078503	0.0054225	1	79	0.47607	4
hsa-mir-940	0.0019381	0.00545	1	155	0.21135	2
EED	0.00078991	0.0054769	1	80	-0.12774	3
TBRG4	0.00080282	0.0056186	1	81	0.35944	5
ZNF571	0.00084777	0.0057854	1	82	-0.26534	2
PRSS22	0.00085997	0.0058891	1	83	-0.26038	3
ATXN7	0.00092468	0.0059439	1	86	0.31293	4
CLIP4	0.00093207	0.0063154	1	87	0.4256	5
PTRF	0.0010282	0.0063264	1	95	-0.38635	2
STOX2	0.0013868	0.006347	1	113	-0.29038	2
RPS10	0.0011095	0.0064283	1	99	-0.39178	2
hsa-mir-891a	0.00226	0.0065476	1	182	-0.70832	1
EIF3K	0.0011789	0.0065873	1	101	0.14239	3
SMOC1	0.00097088	0.0066714	1	90	0.2233	3
MSH4	0.00097088	0.0066714	1	91	-0.16102	2
SEMA3E	0.00097088	0.0066714	1	92	-0.38237	2
SMPD4	0.00098342	0.0066719	1	93	0.55469	4
SCOC	0.00099797	0.0066719	1	94	0.56057	5
FERMT3	0.0012048	0.0067368	1	103	0.42681	4
NMI	0.0012442	0.0067879	1	105	0.35992	4
hsa-mir-3118-3	0.013325	0.0069552	1	912	2.8812	1
CENPE	0.0016083	0.0072339	1	127	0.62285	4
hsa-mir-4297	0.0046475	0.0073989	1	348	-0.85891	1
DPP7	0.0010956	0.0074217	1	97	0.6375	5
hsa-mir-324	0.0024816	0.0074738	1	203	-0.948	1
C16orf62	0.0013837	0.0074853	1	112	0.3717	4
F3	0.0013937	0.0074857	1	114	0.43014	4
GMIP	0.0011095	0.0075045	1	98	0.63317	4
hsa-mir-1285-1	0.0048874	0.0076868	1	360	-0.85891	1
WBSCR22	0.0017064	0.0078828	1	134	-0.21278	3
MTMR1	0.0015005	0.0080706	1	121	0.49864	4
PCDH11Y	0.0015171	0.0080711	1	123	0.34803	4
RPS28	0.0011927	0.0081766	1	102	0.26648	3
hsa-mir-6870	0.0026144	0.0082269	1	213	1.0794	3
hsa-mir-6818	0.0017964	0.0083489	1	142	1.6185	3
C12orf39	0.0012119	0.0086103	1	104	0.69709	5
CXorf30	0.0012518	0.0086108	1	106	0.27072	3
MYOZ1	0.0018782	0.0088109	1	147	0.40082	3
hsa-mir-4789	0.0018793	0.0088114	1	148	0.55883	4
CDS2	0.0019147	0.0089887	1	152	0.09636	3
CD5	0.0013239	0.0091212	1	107	0.46514	5
ZSWIM4	0.00133	0.0091216	1	108	0.76315	5
MCCD1	0.0013375	0.0091216	1	109	0.66347	5
hsa-mir-5697	0.0019781	0.0092318	1	158	0.25017	2
TPMT	0.0017218	0.0092391	1	138	0.39486	4
CCER1	0.0020033	0.009314	1	162	-0.41537	2
DLG4	0.0013816	0.0094205	1	111	0.6487	3
MEGF11	0.0014193	0.009421	1	115	-0.33505	2
POLR2B	0.0014193	0.009421	1	116	0.55483	5
NETO1	0.0014194	0.009421	1	117	0.34522	5
SLC12A2	0.0014415	0.0094813	1	118	0.40927	4
SAMD11	0.0014449	0.0094813	1	119	0.85243	4
PPAP2B	0.0014588	0.0096458	1	120	0.41832	4
NEFL	0.0018205	0.0096787	1	144	0.25984	4
NEU1	0.0018237	0.0096787	1	145	0.58236	5
CYP26B1	0.0019008	0.010029	1	150	-0.051138	3
hsa-mir-1343	0.0021095	0.010047	1	168	0.55924	2
LYL1	0.001918	0.010123	1	153	-0.31072	1
RSRC2	0.001918	0.010123	1	154	0.16657	4
BARX2	0.0015153	0.010279	1	122	0.45537	5
MAP2K1	0.0019633	0.010369	1	156	-0.030929	3
ENTHD2	0.0019837	0.010369	1	160	0.15106	3
GNPTG	0.0019889	0.010369	1	161	0.43459	4
DSCR4	0.001553	0.010491	1	124	0.49434	5
P2RX5	0.001553	0.010491	1	125	0.32814	4
LOC100287177	0.0021488	0.010538	1	171	0.48544	3
MAP3K4	0.002153	0.010538	1	172	0.084937	3
TRIM3	0.0020103	0.010554	1	163	-0.039749	3
KIAA1324L	0.0020158	0.010554	1	164	0.1525	3
GRAMD1C	0.0015644	0.010558	1	126	0.25145	3
MEF2B	0.0021258	0.010758	1	169	-0.5979	1
CD68	0.0016119	0.010861	1	128	0.65783	5
C12orf50	0.0016238	0.010959	1	129	0.28979	4
STYK1	0.0016291	0.010959	1	130	0.34595	4
RRH	0.0016384	0.010959	1	131	0.80069	4
DMRTA1	0.0021737	0.011246	1	174	0.51891	4
hsa-mir-7159	0.0022696	0.01127	1	183	-0.099818	2
BFSP2	0.0016865	0.011575	1	132	0.42027	5
TSLP	0.0016966	0.011575	1	133	0.504	5
ADAM30	0.0022177	0.011661	1	176	0.13435	5
FAM71C	0.0022392	0.011661	1	178	0.44908	4
KLF15	0.002246	0.011661	1	180	0.51459	4
USE1	0.001717	0.011675	1	135	-0.40248	2
UBR2	0.0017193	0.011675	1	136	-0.19443	3
NKX6-1	0.0017193	0.011675	1	137	-0.073821	2
hsa-mir-6804	0.0037672	0.011722	1	297	0.69552	2
MMP14	0.001781	0.011895	1	139	-0.14864	2
ST8SIA1	0.0023104	0.01198	1	189	-0.023761	3
PPP2R5D	0.0023505	0.012089	1	191	-0.016562	3
hsa-mir-29c	0.0023846	0.012122	1	193	1.2825	3
LTN1	0.0017948	0.012155	1	140	0.49439	5
CDH17	0.0017957	0.012155	1	141	0.36612	6
C6orf226	0.0018024	0.012155	1	143	-0.24239	2
TIMM9	0.0023846	0.012203	1	194	0.29595	4
BNC2	0.0023863	0.012203	1	195	0.42195	4
IPMK	0.0039216	0.012224	1	305	-0.68513	2
hsa-mir-8068	0.0024201	0.012443	1	197	0.91279	3
hsa-mir-577	0.0078933	0.01249	1	554	-0.25394	2
BAHD1	0.0018579	0.012531	1	146	-0.13407	1
MFAP3	0.0024902	0.012778	1	204	0.20714	3
CAPN10	0.00188	0.012846	1	149	0.47203	5
PPAT	0.0019133	0.012846	1	151	-0.16378	3
PNP	0.0026099	0.013023	1	212	-0.00062012	3
hsa-mir-639	0.0082987	0.013105	1	579	-0.85891	1
TMPRSS11A	0.0019687	0.013154	1	157	0.35959	3
IL17REL	0.0019798	0.013154	1	159	0.31146	4
ACER3	0.0027028	0.013262	1	217	-0.16595	3
MCCC1	0.0027303	0.013263	1	220	0.4493	3
TRO	0.0027393	0.013263	1	221	0.3733	4
ITIH3	0.0027489	0.013263	1	222	-0.44057	2
hsa-mir-218-2	0.0043069	0.013476	1	326	1.1273	3
TNFRSF6B	0.0020264	0.013517	1	165	-0.022682	3
INPP4B	0.0026678	0.013769	1	214	-0.14394	2
hsa-mir-4999	0.0026799	0.013769	1	215	0.57615	3
MTO1	0.0020795	0.014079	1	166	-0.20636	2
LRRC37A2	0.0020795	0.014079	1	167	-0.47673	2
hsa-mir-5700	0.0087961	0.014197	1	613	-0.43155	1
hsa-mir-216b	0.0027907	0.014214	1	225	-0.025305	2
PAM	0.0028832	0.01423	1	233	0.42685	5
SLC48A1	0.0029262	0.01423	1	235	0.34253	4
PRKAB1	0.0029335	0.01423	1	236	-0.15174	2
LYZL2	0.0089418	0.014433	1	629	0.862	2
ZNF606	0.0021436	0.014506	1	170	0.13551	4
PTPN18	0.002163	0.014636	1	173	-0.34907	2
TESK2	0.0029669	0.014642	1	238	0.39258	4
EXOSC9	0.0022022	0.014775	1	175	0.46993	6
EPM2A	0.0022241	0.014776	1	177	0.31268	5
PPM1M	0.0029988	0.014855	1	239	-0.24571	2
CCDC104	0.0030189	0.014855	1	240	0.16209	3
hsa-mir-3941	0.0029666	0.014942	1	237	0.93093	2
ZMYM5	0.0022459	0.015048	1	179	0.59813	5
MC4R	0.0022484	0.015196	1	181	0.62596	6
SYTL1	0.0022739	0.015409	1	184	0.56286	4
SRXN1	0.0022805	0.01541	1	186	-0.0019098	3
ENTPD5	0.0022839	0.01541	1	187	0.54658	4
hsa-mir-6855	0.0093486	0.015553	1	651	-0.85891	1
MLC1	0.0031667	0.015617	1	251	0.27222	4
CPNE1	0.0031693	0.015617	1	252	0.38692	5
hsa-mir-4500	0.0031759	0.015671	1	253	-0.39325	2
WDR38	0.0023011	0.015723	1	188	-0.0065224	3
MAF	0.0023144	0.015723	1	190	0.66044	5
PCDHA8	0.0096443	0.015775	1	675	0.6778	2
STAG2	0.0023718	0.015867	1	192	0.50893	5
C9orf135	0.002397	0.015867	1	196	0.37514	4
CERS1	0.0032522	0.016009	1	257	0.19521	4
PPP1R7	0.0032978	0.016019	1	259	-0.12087	3
SDCCAG3	0.0033487	0.01602	1	265	-0.11895	3
BLOC1S2	0.0024215	0.016107	1	198	-0.04664	2
LOXHD1	0.0024402	0.016107	1	199	0.18155	3
OR52N4	0.0024402	0.016107	1	200	0.44886	4
ALDH18A1	0.0024489	0.016107	1	201	0.69993	5
EMCN	0.0033577	0.016158	1	267	0.24181	5
SSTR5	0.0024557	0.016204	1	202	-0.46197	2
hsa-mir-6743	0.0097217	0.016495	1	683	0.072125	2
ATXN1	0.0034566	0.016873	1	272	0.01794	3
ZNF586	0.0035289	0.016906	1	276	-0.28561	2
IAH1	0.0025422	0.016983	1	206	0.35351	5
HIST3H2A	0.0034864	0.017047	1	274	-0.19459	3
ARF1	0.0034964	0.017047	1	275	-0.21896	2
GGCT	0.0025501	0.01714	1	207	1.2479	4
CTPS1	0.0025504	0.01714	1	208	0.32283	4
IRS4	0.0025504	0.01714	1	209	-0.10091	2
QSOX1	0.0035793	0.017215	1	280	-0.34355	2
CD46	0.0036134	0.017215	1	283	0.24855	3
GLRA2	0.0036146	0.017215	1	284	0.39914	4
SLC19A3	0.0025701	0.017229	1	210	0.21993	4
MT1B	0.0025701	0.017229	1	211	0.52303	4
CT47B1	0.0036197	0.017254	1	285	0.58517	3
ZSWIM6	0.0037138	0.017904	1	294	0.31954	4
FRMD7	0.0037638	0.018241	1	296	-0.11639	3
ZHX2	0.0037704	0.018241	1	298	0.31399	4
CLEC12A	0.0026888	0.018449	1	216	-0.23613	1
ASTL	0.0027157	0.01879	1	218	-0.20164	2
WWC2	0.0027181	0.01879	1	219	0.44047	6
RNF217	0.0042369	0.018881	1	321	0.23541	3
hsa-mir-3691	0.004257	0.018881	1	323	0.7028	2
hsa-mir-548y	0.0049647	0.018991	1	370	0.57045	3
SLPI	0.0027719	0.019001	1	223	-0.13315	1
JAM2	0.0027738	0.019001	1	224	0.44458	6
LCMT1	0.0028355	0.019266	1	226	0.30389	4
MAPK11	0.0028394	0.019266	1	227	0.0316	3
ZDHHC18	0.0028399	0.019266	1	228	0.27731	6
FAM160B2	0.0028524	0.019443	1	229	0.54242	5
TCEA3	0.0028783	0.019443	1	230	0.46205	5
ZNF829	0.0028826	0.019443	1	231	-0.20163	2
CERS6	0.0028826	0.019443	1	232	0.12019	4
TTBK1	0.0028951	0.019443	1	234	0.49858	5
hsa-mir-6842	0.0051865	0.01945	1	381	0.18298	2
GLO1	0.0044036	0.019597	1	329	0.22008	4
hsa-mir-4709	0.004453	0.019739	1	332	0.80128	3
TCTA	0.003021	0.019761	1	241	-0.001447	3
HS3ST6	0.0030527	0.019761	1	242	0.16657	4
CCDC136	0.0030718	0.019762	1	243	0.05151	3
ANKRD53	0.0030764	0.019762	1	244	0.48131	5
CTSK	0.0030873	0.019762	1	245	0.43278	5
MST1R	0.0031022	0.019762	1	247	0.38118	5
SLC29A2	0.0045505	0.019971	1	340	0.33312	4
hsa-mir-571	0.0052496	0.01998	1	384	0.19107	2
hsa-mir-4732	0.005291	0.01998	1	387	-0.19052	2
SMIM10	0.0031428	0.019983	1	248	0.54466	5
MN1	0.0040972	0.020081	1	315	0.24774	4
RXRG	0.0031594	0.020082	1	249	-0.013547	3
KRT5	0.0031594	0.020082	1	250	-0.20638	2
C15orf59	0.0031844	0.020083	1	254	0.33949	5
hsa-mir-4773-1	0.0054108	0.020317	1	393	-0.065853	2
SSH1	0.0041326	0.020373	1	317	-0.010603	3
GPR18	0.0032389	0.020669	1	256	0.46768	5
EMILIN2	0.0041772	0.020675	1	318	0.30664	4
FAM127B	0.0032655	0.021181	1	258	-0.30484	2
RAET1G	0.0033007	0.021307	1	260	0.5371	5
PRH2	0.003301	0.021307	1	261	0.23572	5
RBM7	0.0033056	0.021307	1	262	0.82368	4
RDH8	0.0033228	0.021492	1	263	0.49005	5
NAB1	0.0033263	0.021492	1	264	0.42885	4
NOXA1	0.0033532	0.021675	1	266	-0.25672	2
hsa-mir-3613	0.0052991	0.021799	1	388	0.84349	3
MOB3C	0.0033725	0.021911	1	268	0.601	4
CCDC116	0.0033765	0.021911	1	269	-1.194	2
ANKRD39	0.0034085	0.021911	1	270	-0.16666	2
hsa-mir-4471	0.0053728	0.021956	1	391	0.31207	2
BMP15	0.0034407	0.022094	1	271	0.32629	4
hsa-mir-3616	0.0054465	0.022114	1	397	-0.065237	2
HBE1	0.0034638	0.022209	1	273	-0.46703	2
ZNF185	0.00353	0.022432	1	277	-0.38352	3
CADM3	0.0035352	0.022432	1	278	0.5542	4
MAPK13	0.0044876	0.022498	1	334	0.14948	3
KHDC1	0.0045237	0.022498	1	338	0.36223	4
IRF9	0.004563	0.022499	1	342	0.35293	4
DUS1L	0.0045957	0.022499	1	344	0.25448	3
ZCCHC18	0.0035627	0.022601	1	279	0.48614	4
INTS12	0.0058886	0.022771	1	428	-0.43134	2
hsa-mir-4522	0.0058886	0.022771	1	429	-0.18407	2
KRTAP9-3	0.0058988	0.022771	1	431	-0.106	3
hsa-mir-6132	0.0059188	0.022771	1	432	-0.10948	2
hsa-mir-6857	0.005996	0.022886	1	435	-0.59104	1
IGFN1	0.003598	0.022895	1	281	0.52493	5
hsa-mir-4268	0.0061614	0.022934	1	444	0.67985	3
VSIG1	0.0036123	0.023011	1	282	0.29614	6
FSTL1	0.0036255	0.023208	1	286	0.56695	5
OR2H1	0.0036285	0.023208	1	287	0.47019	4
SLC22A8	0.0036643	0.023209	1	288	0.19609	4
hsa-mir-6819	0.0062171	0.023255	1	446	-0.68392	1
TP53	0.0063189	0.023281	1	453	0.12005	4
MRPS27	0.0048639	0.023426	1	357	0.31198	4
hsa-mir-5572	0.0064472	0.023445	1	461	0.5631	3
VWA1	0.0049054	0.023634	1	361	0.23103	4
ADAT2	0.0036852	0.023645	1	289	-0.32056	1
NT5C2	0.0036852	0.023645	1	290	-0.24333	2
N4BP2	0.0036852	0.023645	1	291	0.22915	4
POLA1	0.0036852	0.023645	1	292	0.39014	3
ZNF704	0.0036852	0.023645	1	293	0.14715	3
POTEF	0.025637	0.023743	1	1508	0.86355	1
KIAA1009	0.0049141	0.023764	1	362	0.39501	5
C19orf66	0.0049621	0.023764	1	369	0.24714	4
SLC16A2	0.0037243	0.023909	1	295	-0.17646	3
DIRAS3	0.0049762	0.023957	1	372	0.29459	5
FBXW10	0.0037852	0.024101	1	299	0.58911	4
NLRP6	0.005012	0.024176	1	373	0.56559	4
CTNNA3	0.0038038	0.024302	1	300	0.29872	3
F2RL2	0.0050384	0.024305	1	374	0.70009	4
hsa-mir-181c	0.011594	0.024723	1	790	-0.36437	2
hsa-mir-526b	0.011759	0.024723	1	801	-0.1292	2
OSR1	0.003819	0.024746	1	301	-0.45845	2
CUZD1	0.0038482	0.024747	1	302	0.25893	4
NEUROG3	0.0038512	0.024747	1	303	0.34045	6
hsa-mir-3607	0.026275	0.024773	1	1535	1.0412	1
DOK2	0.0038803	0.024872	1	304	0.45912	5
SEC62	0.0039398	0.024994	1	306	-0.13696	3
C9orf85	0.003945	0.024994	1	307	0.59777	4
KCNK17	0.0051455	0.0252	1	377	0.40318	4
WDR4	0.0051464	0.0252	1	378	-0.70084	2
ZMYND19	0.0051611	0.0252	1	379	0.22824	4
hsa-mir-1238	0.012008	0.02524	1	819	-0.85891	1
hsa-mir-589	0.012008	0.02524	1	820	-0.85891	1
SLC25A33	0.0052846	0.025555	1	385	-0.093245	2
ZNF317	0.0052846	0.025555	1	386	-0.024224	3
COCH	0.0040171	0.025563	1	308	0.37048	4
DRD4	0.0040171	0.025563	1	309	0.45515	4
ENSA	0.0040171	0.025563	1	310	-0.21432	2
FGF10	0.0040493	0.025563	1	311	0.33864	4
NCS1	0.0040566	0.025697	1	312	0.41237	4
EIF3G	0.0040839	0.025697	1	313	-0.45795	2
RPL26L1	0.0040873	0.025697	1	314	0.4397	4
WNT2B	0.0053444	0.025711	1	389	0.3667	5
MAU2	0.0053506	0.025711	1	390	0.11692	3
TRIM41	0.0041182	0.025843	1	316	0.22775	4
hsa-mir-4299	0.0072393	0.026071	1	501	-0.22045	2
TMSB15B	0.0072454	0.026071	1	504	0.91857	2
SLC5A5	0.0041853	0.02612	1	319	0.35389	5
ZNF594	0.0041921	0.02612	1	320	0.3404	5
ISG20L2	0.0054313	0.026637	1	395	0.12167	3
TMEM115	0.0054472	0.026637	1	398	-0.16258	3
ERP44	0.005519	0.026797	1	400	0.28189	5
CFP	0.0055246	0.026797	1	401	-0.064901	3
RAC3	0.0055502	0.026797	1	402	0.099984	3
ADCY4	0.0055609	0.026797	1	403	-0.65641	2
ZNF93	0.0056069	0.026797	1	411	0.537	3
MAML2	0.0042498	0.026906	1	322	0.40024	5
BASP1	0.0042651	0.026906	1	324	0.064144	5
LPHN2	0.0056484	0.027001	1	413	0.22428	3
ZNF180	0.0042937	0.027067	1	325	0.30283	3
RPL18	0.005676	0.027391	1	414	-0.86323	2
STRN	0.0043669	0.027431	1	327	0.45903	3
ZNF687	0.00438	0.027431	1	328	0.36038	4
LYST	0.0044183	0.027431	1	330	0.011147	3
TSC1	0.0044365	0.027431	1	331	-0.28137	2
GAGE12H	0.013018	0.027484	1	882	1.8363	2
MTRNR2L4	0.0057203	0.02757	1	416	0.25941	4
IDNK	0.0044823	0.027768	1	333	0.64124	5
MYH3	0.0045149	0.027768	1	335	-0.39621	2
TRAM2	0.0045149	0.027768	1	336	-0.052987	3
GNG5	0.0045149	0.027768	1	337	0.17933	3
S100A1	0.0045248	0.027769	1	339	0.44138	4
ACOT8	0.0045591	0.027769	1	341	0.41659	5
ADCK1	0.0058106	0.02781	1	418	0.022671	3
HOXB13	0.0045936	0.027929	1	343	0.40194	4
SLC24A4	0.004597	0.027929	1	345	0.4488	4
CYP26C1	0.0058371	0.027982	1	421	0.44259	5
PRM1	0.0058419	0.027982	1	423	0.43393	5
hsa-mir-1248	0.013282	0.02803	1	908	0.30299	2
WFDC2	0.0046342	0.028145	1	346	0.59798	4
INO80B	0.0046435	0.028146	1	347	-0.52387	2
NLGN4Y	0.0058719	0.028214	1	426	0.25316	4
AQP4	0.0058832	0.028214	1	427	-0.27598	2
SLC4A5	0.0046807	0.028327	1	349	0.35484	4
ACVR1B	0.0047162	0.028484	1	350	0.38139	5
TAL2	0.0047191	0.028484	1	351	0.37828	4
CHRD	0.0047258	0.028484	1	352	0.27318	4
PARVB	0.004736	0.028484	1	353	-0.37946	2
SLC25A43	0.004737	0.028484	1	354	-0.20844	3
TREX2	0.0047464	0.028484	1	355	-0.026697	3
NUMB	0.006993	0.028704	1	489	0.10891	3
C12orf76	0.0070485	0.028704	1	493	-0.58354	1
hsa-mir-433	0.0079848	0.028839	1	565	0.15393	2
hsa-mir-4634	0.0079848	0.028839	1	566	0.42692	2
PLEKHG4	0.0061133	0.029197	1	440	-0.34032	2
hsa-mir-4456	0.0081723	0.029293	1	572	0.41801	2
SYTL3	0.0074328	0.029355	1	525	-0.85891	2
hsa-mir-675	0.0074611	0.029355	1	527	0.89493	3
RPTOR	0.004886	0.029384	1	358	0.23024	3
HACE1	0.004886	0.029384	1	359	0.1735	3
TPTE	0.0061322	0.029506	1	442	0.61676	4
OSBPL7	0.0062009	0.029506	1	445	0.20367	3
C22orf43	0.007528	0.02955	1	530	0.29419	4
CARNS1	0.0049473	0.029562	1	363	0.38951	4
MORN3	0.0049571	0.029562	1	364	-0.41756	1
FHOD3	0.0049571	0.029562	1	365	-0.34053	2
SATL1	0.0049571	0.029562	1	366	0.11756	4
TMEM259	0.0049571	0.029562	1	367	-0.66835	2
PDK3	0.0049571	0.029562	1	368	-0.31699	1
PRDM12	0.0050456	0.029562	1	375	0.61258	4
hsa-mir-3162	0.0082699	0.029721	1	576	0.81925	3
KREMEN1	0.006242	0.029737	1	448	-0.038536	3
OARD1	0.0050984	0.029763	1	376	0.49616	6
PDZK1	0.0051782	0.029764	1	380	-0.30007	2
OGFOD3	0.0078167	0.030172	1	548	-0.34801	3
IL1RAP	0.0078396	0.030172	1	550	-0.58036	1
MAGEC1	0.0062893	0.030206	1	449	0.17604	4
C6orf118	0.0052099	0.030211	1	382	0.40676	5
CEMP1	0.0052335	0.030211	1	383	0.043596	4
GIPC1	0.0063098	0.030374	1	450	0.12522	3
hsa-mir-4800	0.0085321	0.030585	1	593	0.31054	3
FAP	0.0085864	0.030585	1	598	-0.090755	2
hsa-mir-6826	0.008649	0.030585	1	602	0.96934	3
SLC22A5	0.0053959	0.03076	1	392	0.12935	4
CTAGE1	0.0054169	0.03076	1	394	0.74918	4
CD207	0.0054409	0.030761	1	396	-0.44014	2
DCAF15	0.0054663	0.030761	1	399	0.34582	4
hsa-mir-1293	0.0086864	0.030802	1	604	0.60757	3
hsa-mir-6738	0.0086864	0.030802	1	605	0.96637	3
CDH7	0.0063806	0.03086	1	457	0.30287	4
OXR1	0.005565	0.031051	1	404	0.06222	4
KANSL3	0.005565	0.031051	1	405	-0.084261	3
CDK13	0.005565	0.031051	1	406	0.23452	4
EXOSC4	0.005565	0.031051	1	407	0.16152	5
SLC41A1	0.005565	0.031051	1	408	-0.038853	3
ZNF845	0.005565	0.031051	1	409	0.11721	4
COL4A4	0.005565	0.031051	1	410	0.060518	3
PPP1R12B	0.0083811	0.031517	1	585	-0.10192	3
CCL4	0.0064187	0.031571	1	459	0.069044	3
PMCH	0.0064499	0.031739	1	462	0.3057	4
NUDT8	0.0065368	0.03174	1	465	0.19683	3
GPR124	0.0065802	0.03174	1	467	0.41574	4
ZBTB8B	0.0056432	0.031778	1	412	0.30248	4
hsa-mir-3151	0.015471	0.031923	1	1005	-0.85891	1
MAP6	0.0065983	0.032072	1	468	0.38597	4
CRTAC1	0.0056787	0.032282	1	415	0.68656	4
SYDE1	0.0085723	0.032282	1	596	-0.33683	3
hsa-mir-6886	0.0085882	0.032282	1	599	0.068675	2
TMEM238	0.0086226	0.032282	1	600	-0.25976	3
OTUD1	0.0066859	0.032492	1	472	0.14986	3
hsa-mir-4768	0.0092029	0.032648	1	636	0.46714	3
NDUFC2-KCTD14	0.0092325	0.032649	1	639	0.35977	2
GLIS2	0.0067575	0.032678	1	477	0.11697	3
hsa-mir-553	0.036562	0.032927	1	1973	0.77663	1
hsa-mir-4474	0.037709	0.032927	1	2016	-0.85891	1
TMUB2	0.0067812	0.032928	1	479	0.27872	4
ZSCAN20	0.0087763	0.033003	1	611	-0.85891	2
TUBGCP2	0.0058195	0.03323	1	419	0.24668	4
TRIP4	0.0058239	0.03323	1	420	0.16438	3
BHMT	0.0058412	0.03323	1	422	0.027993	3
TMEM243	0.0058541	0.03323	1	424	-0.21644	3
PTGER1	0.0058672	0.03323	1	425	0.92984	4
DIO2	0.0058964	0.03323	1	430	-0.022556	2
LUC7L2	0.0093781	0.033337	1	653	0.17228	2
TMEM44	0.0069056	0.033354	1	482	0.32455	4
FSTL4	0.006939	0.033354	1	484	0.28425	4
FBXW5	0.0059516	0.033571	1	433	0.27224	3
ZNF449	0.0069719	0.033802	1	487	-0.44301	2
NPPB	0.005978	0.033808	1	434	0.69091	4
LRCH2	0.0060061	0.033808	1	436	0.35283	5
ELMO2	0.0060068	0.033808	1	437	0.1177	3
DDX21	0.0060621	0.03403	1	438	-0.18433	2
OLIG1	0.0060807	0.03403	1	439	0.42186	5
ARHGEF28	0.0061173	0.03403	1	441	0.32225	4
UPK3B	0.0061529	0.03403	1	443	0.29229	4
hsa-mir-4288	0.0088691	0.034195	1	626	1.3169	3
OR8H1	0.0088691	0.034195	1	627	-0.53447	2
SNAI2	0.0090193	0.034196	1	630	0.19314	3
FFAR1	0.0090356	0.034196	1	631	-0.35742	3
DRD2	0.0070043	0.034223	1	491	0.29461	4
C12orf73	0.0070142	0.034223	1	492	0.20032	4
hsa-mir-4705	0.0096323	0.034803	1	672	0.51785	3
EXOSC6	0.0062356	0.034995	1	447	0.50808	4
OR52J3	0.0063111	0.034995	1	451	0.83839	4
CELSR1	0.0063138	0.034995	1	452	0.034951	4
UBL4B	0.006333	0.034995	1	454	0.22321	4
METAP1	0.0063381	0.034995	1	455	-0.14756	3
CA11	0.0063381	0.034995	1	456	0.41706	5
ACSS1	0.0063953	0.034996	1	458	0.36106	3
STC1	0.0064282	0.034996	1	460	0.50806	4
hsa-mir-136	0.0096538	0.035049	1	678	0.38832	3
WIZ	0.007179	0.035333	1	497	0.24757	4
TRANK1	0.0065037	0.03546	1	463	-0.28279	2
MAPT	0.0073132	0.035517	1	505	-0.15204	2
USP28	0.0093938	0.035744	1	655	-0.11823	3
ZBTB6	0.0073292	0.035858	1	507	0.21233	4
MYBL1	0.0073554	0.035858	1	515	-0.58109	2
PDK1	0.0073554	0.035858	1	516	-0.22582	2
BIRC2	0.0073554	0.035858	1	517	0.17433	3
RASSF8	0.0073554	0.035858	1	518	-0.30371	1
SPAG6	0.0073671	0.035858	1	519	0.31148	5
TBC1D17	0.0074262	0.035858	1	524	0.20886	3
RAI1	0.0065361	0.035862	1	464	-0.039822	3
SPEN	0.0065589	0.035863	1	466	0.005657	3
MAS1L	0.0095432	0.036	1	666	0.095336	3
hsa-mir-4801	0.0099197	0.036267	1	694	0.90423	3
GPR137C	0.0066459	0.036451	1	469	-0.2652	2
SH3BGR	0.0066569	0.036451	1	470	-0.14076	3
BTLA	0.0066624	0.036451	1	471	-0.22877	2
ZCRB1	0.0067105	0.036451	1	473	0.31711	4
PRAC	0.0067177	0.036451	1	474	0.021961	3
SCGB1A1	0.0067245	0.036451	1	475	0.22706	4
MYBPHL	0.0067509	0.036451	1	476	-0.20082	3
TRIM34	0.0067731	0.036693	1	478	-0.28982	2
ROCK1	0.0068073	0.036693	1	480	0.0011696	3
RAB7A	0.0068568	0.036694	1	481	0.42892	4
IL4R	0.0069272	0.036694	1	483	0.28164	4
TES	0.0069453	0.036694	1	485	0.1105	3
MAGEA8	0.0075212	0.036794	1	529	0.22679	4
DNASE1L2	0.0075355	0.036794	1	531	0.23409	4
ALDOB	0.0069662	0.036923	1	486	0.53084	4
GPR142	0.0075802	0.036989	1	535	0.2336	3
PGRMC1	0.0069859	0.037081	1	488	-0.028274	2
GRIN2B	0.0070004	0.037081	1	490	0.27443	4
EML3	0.0097299	0.037127	1	685	0.10765	3
hsa-mir-4654	0.0098901	0.037127	1	693	1.0579	3
EPHA2	0.0076038	0.037277	1	536	0.28327	4
YTHDC1	0.0076263	0.037278	1	537	0.073577	3
PRMT3	0.0070645	0.037317	1	494	0.45737	5
hsa-mir-7-2	0.017757	0.037458	1	1108	0.55283	2
SGK110	0.0071155	0.03749	1	495	0.68388	5
CPS1	0.0071211	0.03749	1	496	0.34634	4
ELOVL6	0.0072074	0.03749	1	498	-0.14855	2
DSCAM	0.0072143	0.03749	1	499	0.55883	4
WFDC8	0.0072213	0.03749	1	500	0.29533	5
DNAJB14	0.0072406	0.03749	1	502	0.15786	3
DLST	0.0076428	0.037547	1	538	0.35621	4
PHKG1	0.0072431	0.037752	1	503	0.54792	4
hsa-mir-299	0.010181	0.037981	1	702	0.37181	2
PABPC1L2B	0.03979	0.038	1	2100	0.5624	1
hsa-mir-6758	0.018168	0.038122	1	1130	-0.23421	2
SLC39A12	0.0077688	0.038243	1	543	0.46627	4
PRKCDBP	0.0077714	0.038243	1	544	0.56705	4
NKX6-3	0.0077931	0.038244	1	546	-0.18624	3
UNC50	0.0073211	0.03827	1	506	0.40802	4
C11orf16	0.0073315	0.03827	1	508	0.37735	5
KRTAP19-8	0.0073315	0.03827	1	509	0.025261	3
LRRC8A	0.0073315	0.03827	1	510	-0.076264	3
FAM83E	0.0073315	0.03827	1	511	0.059913	3
OR13H1	0.0073315	0.03827	1	512	0.0036895	3
RCAN1	0.0073315	0.03827	1	513	-0.15011	1
SYNJ2BP	0.0073315	0.03827	1	514	-0.13493	1
NID2	0.010228	0.038271	1	706	-0.37862	3
PMP2	0.010231	0.038271	1	708	0.18191	4
TNXB	0.0073685	0.038511	1	520	-0.061463	2
PEX7	0.0073702	0.038511	1	521	0.77791	4
SLC27A5	0.0073743	0.038511	1	522	-0.16517	2
HMGN2	0.0073841	0.038511	1	523	0.69424	4
KCNK1	0.0078832	0.038525	1	552	0.16494	4
RPS26	0.0078859	0.038525	1	553	-0.39861	2
PITPNB	0.00793	0.038525	1	557	0.033758	3
LRRC34	0.0079565	0.038525	1	560	0.30496	5
ZMYM6	0.0079792	0.038525	1	563	0.34715	5
TTL	0.0079793	0.038525	1	564	0.073144	3
ZNF286A	0.0074427	0.038674	1	526	0.25889	5
SIMC1	0.0074858	0.038674	1	528	0.45335	4
SMAD4	0.0080286	0.038745	1	568	-0.34426	3
LMOD2	0.0080448	0.038745	1	570	-0.27048	2
NTNG2	0.0080979	0.039022	1	571	-0.10243	2
CLU	0.0081824	0.039488	1	573	0.22242	4
ZNF621	0.0075455	0.039763	1	532	0.36376	4
hsa-mir-3118-4	0.018655	0.039845	1	1156	0.74072	2
RAB6B	0.0075697	0.039936	1	533	0.4591	4
TCP11L1	0.007573	0.039936	1	534	0.82037	4
EMR1	0.0076492	0.039937	1	539	0.27794	4
ERC1	0.0076779	0.039937	1	540	0.080801	3
CPNE2	0.0077133	0.039937	1	541	0.21711	4
hsa-mir-5705	0.041904	0.040004	1	2164	-0.85891	1
OSBPL11	0.0077175	0.04021	1	542	-0.012351	3
C20orf202	0.0077727	0.040658	1	545	-0.21766	3
SETD9	0.0078068	0.040659	1	547	0.50393	5
TFDP3	0.0078259	0.040659	1	549	-0.0059979	3
ZNF14	0.007883	0.040846	1	551	-0.036011	3
AMH	0.0079031	0.040846	1	555	0.31391	4
SASH3	0.0079273	0.040846	1	556	0.17261	5
NTSR2	0.0079333	0.040846	1	558	0.085012	3
PRG3	0.0079549	0.040846	1	559	0.31277	4
ZNF341	0.0079663	0.040847	1	561	0.18181	3
EN1	0.0079663	0.040847	1	562	0.35572	3
FDFT1	0.0079932	0.040847	1	567	0.18365	5
FUT5	0.008039	0.040847	1	569	0.25816	4
hsa-mir-4538	0.018882	0.040905	1	1168	-0.85891	1
hsa-mir-4479	0.010874	0.041215	1	741	0.47406	3
hsa-mir-3653	0.010947	0.041216	1	745	0.81195	3
hsa-mir-506	0.011127	0.041578	1	753	0.56244	3
TSPAN5	0.011146	0.041578	1	768	-0.12631	3
KCNRG	0.011293	0.041579	1	775	-0.85891	1
hsa-mir-4435-1	0.011343	0.041579	1	778	0.71732	4
RCN3	0.011549	0.041926	1	787	-0.52575	2
ING5	0.0081858	0.042071	1	574	0.0551	3
hsa-mir-4657	0.011412	0.042302	1	782	0.73277	3
ERN1	0.0082137	0.042368	1	575	-0.079534	3
OR10J5	0.0083398	0.042369	1	580	0.66708	5
LOC100288814	0.0083398	0.042369	1	581	0.41702	5
ABCB10	0.0083447	0.042369	1	582	0.13469	3
DMRTA2	0.0083512	0.042369	1	583	0.21724	5
KLHDC7B	0.0083791	0.042369	1	584	-0.59579	1
CCDC180	0.0083885	0.042556	1	586	0.23584	4
OR10G2	0.0084198	0.042557	1	587	0.29928	4
hsa-mir-337	0.011817	0.042573	1	808	0.29191	3
hsa-mir-211	0.019615	0.042653	1	1204	-0.26498	2
JKAMP	0.008468	0.042856	1	589	-0.08411	2
SAMD13	0.0084967	0.042856	1	590	0.29407	5
hsa-mir-181b-1	0.012414	0.043124	1	850	0.71252	3
SERINC4	0.0085292	0.043156	1	592	0.53106	5
GSTCD	0.0085422	0.043156	1	594	-0.64549	3
CRLF1	0.0085856	0.043156	1	597	0.28511	3
hsa-mir-449a	0.011623	0.043243	1	792	-0.33419	2
hsa-mir-4257	0.012557	0.043399	1	857	-0.071794	2
LGALS7B	0.020003	0.043402	1	1226	0.8439	2
CGGBP1	0.008754	0.04365	1	607	0.25346	4
PRR14L	0.0087664	0.04365	1	609	0.31816	4
PEA15	0.0087721	0.04365	1	610	0.32047	3
hsa-mir-4444-1	0.012631	0.043681	1	861	0.42512	3
hsa-mir-3659	0.011806	0.043821	1	805	0.84615	2
MBD4	0.0088199	0.044227	1	615	0.10969	4
SLC2A13	0.0088199	0.044227	1	616	-0.11331	3
NR0B1	0.0088199	0.044227	1	617	-0.13627	2
SOBP	0.0088199	0.044227	1	618	0.076186	4
BTN3A3	0.0088199	0.044227	1	619	-0.28598	2
ENGASE	0.0088199	0.044227	1	620	0.0023356	3
RNF103	0.0088199	0.044227	1	621	0.11261	4
GPR63	0.0088221	0.044227	1	622	0.39303	5
ROBO2	0.0088356	0.044227	1	623	-0.092618	2
PTAFR	0.0088528	0.044228	1	624	0.27426	4
ICA1L	0.0088545	0.044228	1	625	-0.21974	2
hsa-mir-2052	0.020298	0.044498	1	1237	1.6382	2
hsa-mir-4704	0.013478	0.045094	1	914	0.97732	3
PRICKLE2	0.0082746	0.04515	1	577	-0.17581	3
ETS1	0.0082828	0.04515	1	578	0.33545	4
hsa-mir-664b	0.013536	0.045386	1	915	0.043838	2
POLE	0.012224	0.045392	1	833	-0.61642	2
IPCEF1	0.012346	0.045392	1	847	0.2767	3
GSG2	0.0084659	0.045443	1	588	0.12778	3
HIST1H2BI	0.012657	0.045998	1	864	-0.068631	3
SPATA31A4	0.012851	0.045998	1	874	-0.72433	2
TOMM40	0.012851	0.045998	1	875	-0.57758	1
AKR1C2	0.012851	0.045998	1	876	-0.073919	2
KRTAP19-4	0.0085185	0.046233	1	591	0.32296	4
CXCL9	0.0085449	0.046233	1	595	0.15852	4
hsa-mir-676	0.013749	0.046275	1	924	0.87366	3
hsa-mir-4790	0.02119	0.046381	1	1291	-0.39133	1
hsa-mir-6741	0.021922	0.046381	1	1330	-0.85891	1
C10orf129	0.0086469	0.046528	1	601	0.14861	4
PICK1	0.0086741	0.046528	1	603	0.18844	5
hsa-mir-4743	0.013798	0.046559	1	927	-0.24072	2
LSM4	0.012938	0.046626	1	878	0.020504	3
C14orf119	0.0086878	0.046732	1	606	0.06367	3
GPR75-ASB3	0.01382	0.046823	1	928	0.40309	2
hsa-mir-646	0.014279	0.046823	1	952	-0.054279	2
S100A8	0.0090444	0.046978	1	632	-0.14692	3
CD38	0.0090843	0.046978	1	634	0.41942	5
MED22	0.0091504	0.046978	1	635	0.25057	3
LGALS3BP	0.0092041	0.046978	1	637	0.46148	4
GEMIN4	0.0092041	0.046978	1	638	0.049789	3
RUSC2	0.0092476	0.04719	1	640	0.41411	4
KRTAP5-8	0.0092536	0.04719	1	642	0.55016	4
SCD	0.0092536	0.04719	1	643	0.67765	5
PRKAG2	0.0092536	0.04719	1	644	0.38443	4
MRPL19	0.0093157	0.04719	1	650	0.23264	4
GRIN3A	0.0093707	0.04719	1	652	-0.47486	1
NOL10	0.0094258	0.04719	1	656	-0.28506	1
CACNG2	0.0087626	0.047336	1	608	0.29461	4
GUCY2F	0.0087884	0.047336	1	612	0.25266	5
CHURC1	0.0094555	0.047411	1	657	0.298	4
ENDOV	0.0088187	0.047641	1	614	0.37426	3
TAC1	0.0094616	0.047879	1	659	0.55925	4
ATP13A3	0.0094801	0.047879	1	660	0.40499	4
OR4A47	0.0094823	0.047879	1	661	0.27998	5
CLEC14A	0.0095143	0.047879	1	662	0.45036	4
ARF6	0.009518	0.047879	1	663	0.321	4
SORBS1	0.0095637	0.04788	1	667	0.44516	4
LRFN3	0.009591	0.04788	1	669	-0.42113	1
MRPS2	0.0095943	0.04788	1	670	0.55634	4
ORC1	0.0089303	0.047946	1	628	-0.12768	2
TBC1D2	0.013664	0.047959	1	917	-0.60854	2
ST14	0.0096498	0.048205	1	677	0.41681	4
CELF6	0.0096787	0.048205	1	680	0.57846	5
GPR31	0.0096997	0.048205	1	682	0.20283	4
SLC25A51	0.0090762	0.048247	1	633	-0.38968	2
SH3PXD2B	0.01399	0.048314	1	936	-0.090725	3
hsa-mir-640	0.014041	0.048314	1	939	-0.24037	2
ZNF277	0.0097906	0.048649	1	686	0.36189	5
COPS2	0.0092479	0.04881	1	641	0.29768	4
MBD3L2	0.009285	0.04881	1	645	-0.34013	2
GPR107	0.009285	0.04881	1	646	-0.18132	2
CEP85	0.009285	0.04881	1	647	-0.67462	1
RPA1	0.009285	0.04881	1	648	-0.8762	1
CDIP1	0.0093017	0.04881	1	649	0.22215	4
LRRC4	0.0098112	0.048861	1	687	0.1363	4
EPPIN	0.0098292	0.048861	1	689	-0.073924	2
HPRT1	0.0098533	0.048861	1	690	0.7214	5
hsa-mir-4515	0.048652	0.048934	1	2417	-0.85891	1
VPS37D	0.014114	0.049019	1	945	-0.31074	3
POLR3F	0.009391	0.049348	1	654	0.44375	4
FAM149A	0.0094582	0.049349	1	658	0.24958	4
RCOR2	0.0095182	0.049651	1	664	0.39583	4
MAPK8IP2	0.0095403	0.049651	1	665	0.30637	5
MUC15	0.0095849	0.049868	1	668	-0.24803	3
PRAMEF17	0.0096141	0.049868	1	671	0.43219	3
LOC650293	0.0096386	0.049868	1	673	-0.30396	3
SLC16A7	0.009644	0.049868	1	674	-0.21579	2
TTC37	0.0096456	0.049868	1	676	0.37345	4
ADARB2	0.0096635	0.049868	1	679	0.31442	5
TAF6L	0.0096981	0.049868	1	681	-0.028236	3
hsa-mir-513a-2	0.0504	0.049921	1	2470	1.5105	1
hsa-mir-1193	0.014314	0.050094	1	955	1.0763	3
SMCR9	0.014334	0.050094	1	956	-0.14402	3
TSPYL5	0.0097233	0.0502	1	684	-0.015537	3
hsa-mir-558	0.022526	0.050256	1	1359	-0.13938	2
CBX6	0.0098291	0.050524	1	688	0.46276	4
SOX1	0.0098604	0.050524	1	691	0.0080521	3
GLTP	0.0098675	0.050524	1	692	0.42777	5
PCK1	0.014773	0.051532	1	972	-0.85891	1
hsa-mir-4443	0.023385	0.051807	1	1392	-0.16375	2
B4GALT2	0.010005	0.052303	1	696	0.07973	3
PDLIM1	0.010019	0.052504	1	697	-0.40569	2
RGS20	0.010038	0.052504	1	699	0.30257	5
U2AF1	0.010203	0.053992	1	703	-0.012024	3
FIBP	0.010231	0.053992	1	707	-0.30132	3
SLC13A3	0.01025	0.053992	1	709	0.16878	4
TLK2	0.010355	0.053992	1	714	0.13038	4
STARD3	0.010365	0.053992	1	716	0.29592	3
CCDC85B	0.010386	0.053992	1	720	-0.1305	2
PRKACA	0.010387	0.053992	1	721	0.069299	3
hsa-mir-4639	0.015724	0.054471	1	1012	-0.23601	1
hsa-mir-3146	0.015724	0.054471	1	1013	-1.5731	1
ZNF677	0.0099763	0.0545	1	695	-0.21154	2
GNE	0.010031	0.054501	1	698	-0.39217	1
C12orf75	0.010495	0.054576	1	724	0.08483	4
CD163L1	0.010524	0.054576	1	726	-0.20934	2
PIEZO1	0.01065	0.054953	1	730	0.37378	5
DSE	0.010658	0.054953	1	732	0.44495	4
KIF21B	0.010821	0.054954	1	736	0.30219	4
CDC42EP1	0.010086	0.055072	1	700	0.096265	4
ATXN3	0.0109	0.0553	1	742	0.3337	5
PCSK2	0.010907	0.0553	1	743	0.27813	4
AKAP3	0.010941	0.0553	1	744	0.23366	3
hsa-mir-759	0.024336	0.055468	1	1445	-0.85891	1
hsa-mir-612	0.024591	0.055468	1	1459	-0.45129	1
NTF4	0.010129	0.055601	1	701	-0.024665	3
SCRN3	0.010209	0.055602	1	704	-0.021755	3
FAM155B	0.010213	0.055602	1	705	0.17535	3
GDNF	0.010251	0.055602	1	710	-0.0054293	3
SIGLEC8	0.010256	0.055602	1	711	-0.16659	2
TNFRSF25	0.016163	0.055612	1	1037	-0.43348	1
DOCK6	0.011074	0.055763	1	747	0.22095	5
ABCC2	0.011074	0.055763	1	748	-0.060261	2
PDF	0.011074	0.055763	1	749	0.44211	4
GDPD5	0.011074	0.055763	1	750	0.10208	4
CLDN22	0.011096	0.055763	1	751	-0.63563	2
AZI2	0.011146	0.055763	1	767	0.24803	4
KARS	0.011165	0.055763	1	770	-0.60344	2
SSX3	0.011228	0.055763	1	772	1.1838	4
VWF	0.010277	0.055927	1	712	0.41327	5
EGFL7	0.01625	0.056012	1	1041	-0.29825	3
ZNF331	0.011289	0.056117	1	773	0.51925	4
ANKRD23	0.011292	0.056117	1	774	0.22911	4
NLRP2	0.010327	0.056145	1	713	0.0042182	3
VKORC1	0.010362	0.056145	1	715	0.10441	4
PHACTR2	0.010365	0.056145	1	717	0.20821	4
ARPC3	0.01037	0.056145	1	718	0.57336	5
GHSR	0.01038	0.056145	1	719	0.43182	4
LRFN2	0.010414	0.056145	1	722	0.41181	4
ZFR	0.010417	0.056145	1	723	-0.54827	2
CAPNS2	0.011325	0.056376	1	776	0.098951	3
OR10C1	0.011355	0.056376	1	779	0.21468	4
ZNF841	0.011426	0.056641	1	784	0.22923	4
TNNT3	0.011532	0.056642	1	786	-0.34592	2
WWC3	0.011557	0.056642	1	788	0.35205	4
ZNF320	0.011624	0.056642	1	793	0.045569	3
hsa-mir-4266	0.017362	0.056864	1	1087	0.98393	2
hsa-mir-3175	0.017362	0.056864	1	1088	-0.0079103	2
ZCCHC8	0.011653	0.056884	1	794	0.095985	4
KIF3A	0.01167	0.056885	1	795	-0.56948	2
TOMM5	0.010514	0.056953	1	725	0.21565	4
RPS7	0.010535	0.056953	1	727	-0.089	2
KCP	0.010562	0.056953	1	728	0.17617	4
CENPA	0.010619	0.057159	1	729	-0.00075289	3
ASAP2	0.010657	0.05748	1	731	0.36506	3
CSH2	0.017701	0.05752	1	1103	0.59748	2
hsa-mir-4264	0.017957	0.05752	1	1120	0.12229	3
PNISR	0.011736	0.057604	1	800	-0.096715	3
GPSM3	0.011786	0.057604	1	802	0.25127	4
GLB1L3	0.011807	0.057604	1	806	0.48778	3
CITED4	0.011861	0.057605	1	811	0.18581	4
CD8B	0.011899	0.057605	1	813	-0.25765	3
PVR	0.011899	0.057605	1	814	-0.35203	1
ATF1	0.010685	0.057745	1	733	0.24689	3
hsa-let-7a-1	0.016762	0.058062	1	1057	0.72808	3
GOLGA6L10	0.016784	0.058062	1	1059	-0.37082	1
hsa-mir-4498	0.016823	0.058062	1	1061	0.54968	3
SOX14	0.016993	0.058062	1	1068	0.097002	3
PEX16	0.01074	0.058097	1	734	0.066289	3
hsa-mir-190b	0.018601	0.058205	1	1155	-0.30816	1
hsa-mir-921	0.018738	0.058205	1	1159	0.49404	3
PPP3CC	0.012	0.058476	1	818	0.27502	5
ACO2	0.010802	0.058544	1	735	-0.32666	2
MSC	0.010829	0.058544	1	737	0.23053	5
OCIAD2	0.010837	0.058545	1	738	0.2667	5
DENND2C	0.010844	0.058545	1	739	0.40121	4
RBMXL1	0.010845	0.058545	1	740	0.4081	4
KIF18B	0.017263	0.058805	1	1080	0.10216	4
C12orf49	0.017405	0.058806	1	1089	-0.25409	2
RASD1	0.01205	0.058845	1	823	-0.71094	2
PIK3CD	0.012058	0.058845	1	824	0.35645	4
OR4X2	0.01206	0.058845	1	825	0.25517	5
ASCC1	0.010961	0.059138	1	746	-0.12456	3
RCBTB2	0.011107	0.059138	1	752	0.15555	3
ST6GALNAC5	0.017551	0.059217	1	1094	-0.33223	1
SCN1B	0.017588	0.059217	1	1095	0.054991	4
XKR4	0.011132	0.059495	1	754	-0.021382	3
DSC3	0.011132	0.059495	1	755	0.045623	3
PDZK1IP1	0.011132	0.059495	1	756	-0.17056	1
F9	0.011132	0.059495	1	757	0.22188	4
TNFSF12	0.011132	0.059495	1	758	0.026856	3
TRAFD1	0.011132	0.059495	1	759	-0.1125	3
ALKBH4	0.011132	0.059495	1	760	-0.13693	3
KLC3	0.011132	0.059495	1	761	0.0092832	3
ARL14EP	0.011132	0.059495	1	762	-0.40364	2
BRCA2	0.011132	0.059495	1	763	-0.17045	3
GPRC6A	0.011132	0.059495	1	764	0.23797	4
SFMBT2	0.011132	0.059495	1	765	0.28598	5
FAM171B	0.011132	0.059495	1	766	-0.22874	2
CHST14	0.011164	0.059495	1	769	0.23448	3
MAP3K10	0.01122	0.059495	1	771	0.31232	6
SPANXN3	0.012082	0.059495	1	827	-0.40171	2
hsa-mir-367	0.017694	0.059607	1	1102	0.29404	2
hsa-mir-1295a	0.01771	0.059607	1	1105	0.63221	4
SLC5A2	0.01777	0.059607	1	1110	-0.099017	2
hsa-mir-548b	0.026177	0.059623	1	1531	-0.15739	2
STX12	0.012182	0.059763	1	831	-0.095506	3
CRHR2	0.012257	0.059764	1	836	0.22893	4
SCPEP1	0.012265	0.059764	1	837	-0.49782	2
OR9G1	0.012267	0.059764	1	839	0.3736	4
SLC6A17	0.012288	0.059764	1	842	0.28132	4
LOC100505549	0.012417	0.060019	1	851	0.1588	3
CLK1	0.011327	0.060096	1	777	0.3382	4
SLC6A6	0.011379	0.060097	1	780	0.026721	3
TPD52	0.011386	0.060097	1	781	0.24558	4
CCDC78	0.011422	0.060097	1	783	0.47405	5
ZFAND5	0.012494	0.060263	1	853	0.054651	3
ARHGAP11B	0.020225	0.060416	1	1232	1.3439	3
LHFP	0.011501	0.060466	1	785	0.28778	5
SH3GL2	0.012586	0.060528	1	859	0.0093214	3
MGARP	0.012632	0.060528	1	862	-0.64265	2
ANKMY2	0.012635	0.060528	1	863	0.47475	5
FUBP3	0.011573	0.060831	1	789	0.57051	5
TMEM225	0.011618	0.060831	1	791	0.4094	4
PTAR1	0.011681	0.060831	1	796	-0.10488	3
STAU2	0.01169	0.060831	1	797	0.1326	3
PAPLN	0.01172	0.060831	1	798	0.46586	4
LCAT	0.011731	0.060831	1	799	0.2717	4
hsa-mir-3529	0.018036	0.060839	1	1123	0.042901	2
C15orf57	0.012727	0.060897	1	865	0.026516	3
DFFA	0.011791	0.061079	1	803	-0.17664	2
CYP3A7	0.011796	0.061079	1	804	-0.024777	3
ZNF771	0.011811	0.061079	1	807	0.4063	4
C19orf57	0.011846	0.061079	1	809	-0.54666	1
FAM129C	0.011856	0.061079	1	810	0.22557	4
EXTL2	0.011879	0.061079	1	812	-0.081387	3
TRAPPC1	0.011901	0.061079	1	815	-0.26645	2
SPRR1B	0.011915	0.061079	1	816	0.42724	4
NPY	0.012783	0.06128	1	869	0.17181	3
RNF219	0.012843	0.06128	1	872	0.19607	5
C16orf96	0.01285	0.06128	1	873	0.11462	4
CLEC4C	0.011995	0.061594	1	817	0.47454	4
PRPF40A	0.012017	0.061594	1	821	0.62697	5
HIST1H1C	0.012023	0.061594	1	822	0.42264	4
NVL	0.012066	0.061594	1	826	-0.97355	2
LTA4H	0.013017	0.061652	1	881	0.1863	3
LOC389895	0.013033	0.061652	1	883	0.12633	3
2025-09-15	0.013078	0.061652	1	887	0.17644	3
TNFRSF11A	0.013186	0.061653	1	890	-0.14296	2
RPL29	0.013272	0.061653	1	893	-0.51577	1
SSBP3	0.013272	0.061653	1	894	-0.40834	1
OR4P4	0.013272	0.061653	1	895	-0.22295	1
MVK	0.013272	0.061653	1	896	0.20175	3
VAMP2	0.013272	0.061653	1	897	-0.116	3
GPATCH3	0.013272	0.061653	1	898	0.16918	4
UBFD1	0.013272	0.061653	1	899	-0.22093	2
hsa-mir-4752	0.018062	0.061671	1	1124	0.51965	2
hsa-mir-378a	0.020931	0.061956	1	1275	-0.10886	2
LRRC10B	0.013275	0.062036	1	907	0.31633	4
GSK3A	0.012121	0.06204	1	828	0.099092	3
A2M	0.012138	0.062041	1	829	0.40726	4
NOMO3	0.027659	0.062241	1	1596	0.62376	1
ATP13A2	0.01218	0.062505	1	830	0.13042	4
MTSS1L	0.012209	0.062506	1	832	0.023842	3
AFM	0.012232	0.062506	1	834	0.28934	4
CGA	0.012246	0.062506	1	835	0.38399	5
OR3A3	0.012267	0.062891	1	838	0.56682	4
MSANTD2	0.012282	0.062891	1	840	-0.16165	2
CCDC69	0.012286	0.062891	1	841	-0.034241	3
IKZF3	0.012294	0.062892	1	843	0.37732	5
OR51V1	0.018227	0.062926	1	1137	-0.19711	3
UTP18	0.018281	0.062926	1	1141	-0.74448	1
hsa-mir-3692	0.018389	0.062926	1	1147	0.70343	3
AFAP1L2	0.01332	0.062949	1	911	0.10881	3
SLC43A3	0.012319	0.063273	1	844	0.33176	4
GPR55	0.012326	0.063273	1	845	0.27287	4
FBN3	0.012341	0.063273	1	846	0.068436	3
PTPN9	0.012385	0.063273	1	848	0.18055	4
STPG1	0.012396	0.063273	1	849	0.24855	5
ZBTB42	0.018483	0.063373	1	1151	-0.40959	3
MIF	0.018523	0.063373	1	1152	-0.25937	3
BABAM1	0.012475	0.063525	1	852	0.21225	3
SF3B2	0.012505	0.063525	1	854	-0.35047	2
FBXO4	0.01251	0.063525	1	855	0.26685	3
SLC25A34	0.013755	0.063722	1	925	-0.04043	3
CSNK1D	0.013776	0.063722	1	926	-0.3699	2
UBXN2A	0.018848	0.063806	1	1165	0.0925	3
ZC2HC1B	0.012522	0.063907	1	856	0.3289	4
CEL	0.013867	0.064096	1	931	0.11386	4
TEX264	0.01256	0.064165	1	858	0.036753	3
SCN3A	0.012619	0.064165	1	860	0.40205	4
hsa-mir-6858	0.023021	0.064354	1	1380	-0.58552	1
PRSS50	0.019062	0.064681	1	1178	0.13885	4
TMEM133	0.013959	0.064768	1	934	-0.016542	2
SERPINA9	0.01405	0.064769	1	942	-0.26625	3
hsa-mir-3938	0.023409	0.064795	1	1400	-0.11732	2
SLC8B1	0.023553	0.064795	1	1412	-0.51188	1
NEURL4	0.012733	0.064828	1	866	0.33192	4
RIMS2	0.012757	0.064829	1	867	0.36658	5
hsa-mir-3194	0.028388	0.064897	1	1633	-0.85891	1
hsa-mir-611	0.028718	0.064897	1	1645	0.08273	2
PCDHGB6	0.028735	0.064897	1	1647	0.58828	2
CDK8	0.014142	0.065151	1	947	-0.17547	3
ADAMTSL4	0.012777	0.065189	1	868	-0.22319	2
F7	0.01279	0.065189	1	870	0.37184	4
GRHL3	0.012842	0.065189	1	871	0.44141	4
SYT6	0.012874	0.06519	1	877	0.55903	5
ATP6AP1	0.012956	0.06519	1	879	0.49807	4
hsa-mir-4530	0.029409	0.065354	1	1674	-0.084773	2
SPIN2A	0.012989	0.065446	1	880	0.26305	5
LTB4R2	0.019405	0.06555	1	1194	-0.30273	3
FAM166A	0.019558	0.065551	1	1199	-0.22336	3
KRTAP10-10	0.019558	0.065551	1	1200	0.075919	3
OR2AG1	0.019573	0.065551	1	1202	-0.28815	3
FBXL3	0.014303	0.065712	1	954	0.12776	3
CTTN	0.014395	0.066119	1	959	0.32566	3
PRDM2	0.014402	0.066119	1	960	0.14227	3
PTTG2	0.013039	0.06612	1	884	0.18908	4
LARP1B	0.013051	0.06612	1	885	0.063835	3
NEK11	0.013066	0.066121	1	886	-0.2747	2
DCAF17	0.014462	0.066422	1	963	-0.38462	2
TMEM249	0.014549	0.066422	1	967	0.062078	3
MAGEH1	0.01456	0.066422	1	968	0.17705	3
FGF4	0.014677	0.066422	1	970	-0.0013357	3
AGMAT	0.014782	0.066422	1	973	0.058124	3
PDXP	0.014803	0.066422	1	974	0.26293	4
CD9	0.01313	0.066496	1	888	0.21264	4
hsa-mir-615	0.024345	0.066516	1	1446	-0.23499	2
hsa-mir-7110	0.019777	0.066851	1	1215	0.16686	3
SLC9A2	0.01314	0.066893	1	889	0.18374	3
YWHAQ	0.013216	0.066893	1	891	0.42235	4
KCNE3	0.013259	0.066893	1	892	0.094205	4
MPO	0.013274	0.066893	1	900	0.083128	4
APCDD1	0.013274	0.066893	1	901	0.12164	4
POU4F2	0.013274	0.066893	1	902	0.059306	3
SURF4	0.013274	0.066893	1	903	-0.12072	2
BANF2	0.013274	0.066893	1	904	0.26527	4
TAS2R3	0.013274	0.066893	1	905	0.026	3
HDGFRP3	0.013274	0.066893	1	906	-0.11232	2
S100Z	0.013308	0.066893	1	909	-0.014487	3
SLC38A6	0.013311	0.066893	1	910	0.48312	5
SLC22A3	0.013373	0.066893	1	913	0.12765	3
BCCIP	0.014827	0.066998	1	976	-0.76065	2
hsa-mir-652	0.025137	0.067392	1	1480	-1.1675	1
STEAP1B	0.013571	0.067577	1	916	-0.09255	3
FAM178B	0.014952	0.067637	1	986	0.23713	4
DHCR24	0.014989	0.067638	1	987	0.21885	3
MAT1A	0.015153	0.067961	1	992	0.34632	4
DHRS7B	0.015239	0.067961	1	995	0.0043866	3
JAG1	0.015284	0.067961	1	998	-0.21687	2
CD200	0.015376	0.067961	1	1000	-0.48571	1
CARD11	0.015395	0.067961	1	1002	0.36117	4
KIR3DL3	0.013664	0.068015	1	918	0.34228	4
G6PD	0.013664	0.068015	1	919	0.51358	5
CLDND2	0.015513	0.068257	1	1006	-0.15328	3
OR2T10	0.013672	0.06843	1	920	0.35802	4
KRT20	0.015581	0.068686	1	1008	0.16725	4
BLZF1	0.013702	0.068856	1	921	-0.46664	3
APOL5	0.013709	0.068856	1	922	0.26149	4
BCL11A	0.013732	0.068856	1	923	0.075539	4
YY1	0.020578	0.069078	1	1254	-0.19652	2
FAM208B	0.015642	0.069095	1	1010	0.050696	4
TIPARP	0.015724	0.069095	1	1011	-0.028831	3
KCTD12	0.015727	0.069095	1	1014	-0.035825	3
COMMD5	0.015808	0.069425	1	1017	-0.35247	2
C1QL2	0.015852	0.069425	1	1019	-0.30967	2
IFIT5	0.016038	0.069425	1	1033	-0.20354	2
SLC5A10	0.016038	0.069425	1	1034	-0.53505	1
ALPK3	0.016178	0.069425	1	1038	0.13381	3
DUSP19	0.016267	0.069425	1	1043	0.098467	3
CSTA	0.016273	0.069425	1	1044	-0.41837	2
DPEP2	0.013858	0.06944	1	929	0.29809	3
PCP4	0.013864	0.06944	1	930	0.075553	3
TOP1	0.013875	0.06944	1	932	0.43455	4
APOC2	0.013913	0.06944	1	933	0.32733	4
AADAT	0.01398	0.06944	1	935	-0.097194	3
APOC4	0.014027	0.06944	1	937	0.29643	4
ZMAT3	0.014032	0.06972	1	938	0.27748	5
FAM208A	0.014042	0.06972	1	940	0.20869	4
NXF2	0.014047	0.06972	1	941	0.26675	4
TFF1	0.014058	0.06972	1	943	-0.031562	3
CA3	0.014097	0.06972	1	944	0.50308	4
SV2B	0.014137	0.069721	1	946	0.21137	4
JMJD7	0.014183	0.069721	1	948	-0.040166	3
HTR2B	0.014193	0.069721	1	949	0.32485	5
ACTRT3	0.01644	0.069845	1	1047	0.21911	4
ATP6V0A4	0.016517	0.069845	1	1050	-0.48354	1
PTBP3	0.016546	0.069846	1	1051	0.3107	3
WDR66	0.014207	0.069996	1	950	-0.16828	3
LPPR1	0.014226	0.069996	1	951	0.37811	4
USP13	0.014288	0.069996	1	953	0.29431	4
MAK	0.014371	0.07042	1	957	-0.6143	1
PDZD3	0.016825	0.070501	1	1062	-0.16765	3
HTR1E	0.016837	0.070502	1	1063	0.20429	3
ZNF197	0.014387	0.070729	1	958	-0.27323	2
MNDA	0.014422	0.07073	1	961	0.1978	4
RASGRP3	0.01443	0.07073	1	962	0.26478	4
CORO1A	0.017019	0.07082	1	1070	-0.078842	3
CIC	0.014517	0.071143	1	964	0.49126	4
XG	0.014536	0.071143	1	965	0.20869	4
SLC25A41	0.014549	0.071143	1	966	0.56592	5
BRF1	0.01715	0.071254	1	1074	-0.87142	2
IRGC	0.01716	0.071254	1	1076	0.07982	3
DENND6A	0.01721	0.071254	1	1077	-0.2778	3
PLP2	0.014645	0.07157	1	969	0.41947	3
SLC25A20	0.014755	0.07157	1	971	-0.16485	3
KRTAP5-4	0.01481	0.07157	1	975	-0.053827	3
UQCRH	0.01483	0.07157	1	977	0.44345	4
RAB5B	0.014838	0.07157	1	978	0.081383	3
AMDHD2	0.014854	0.071863	1	979	0.039579	3
LDLRAD2	0.014865	0.071863	1	980	-0.077518	2
hsa-mir-4738	0.026221	0.07188	1	1534	0.21325	2
POTEH	0.066708	0.071886	1	3052	0.059856	1
ABCC9	0.017269	0.072036	1	1082	0.19036	3
LRRC52	0.017293	0.072036	1	1084	0.033065	3
LINGO3	0.01736	0.072036	1	1086	0.058618	3
SLC10A5	0.017428	0.072036	1	1090	0.22012	3
UPP2	0.017475	0.072036	1	1091	0.41637	4
hsa-mir-6754	0.031276	0.072047	1	1768	-0.85891	1
NMRAL1	0.014876	0.07207	1	981	0.71944	5
SEMA3A	0.014911	0.072276	1	982	0.25568	4
GFRA2	0.01492	0.072276	1	983	-0.01646	3
PC	0.014928	0.072276	1	984	0.27303	3
WDR72	0.014928	0.072276	1	985	0.35163	3
SELV	0.015029	0.072276	1	988	-0.20014	2
PPBP	0.015033	0.072276	1	989	0.52893	5
AFF4	0.015067	0.072276	1	990	0.16712	4
TMEM241	0.015092	0.07272	1	991	0.39165	5
C11orf85	0.017589	0.07284	1	1096	-0.81258	2
ARHGAP36	0.017597	0.07284	1	1097	0.18224	4
KRTAP3-3	0.017703	0.073201	1	1104	0.02133	3
GIMAP1	0.017731	0.073201	1	1106	0.5069	3
FAM71E1	0.015194	0.073643	1	993	-0.51113	1
CEBPE	0.015196	0.073643	1	994	0.57913	6
HSD3B7	0.015257	0.073643	1	996	0.25247	4
PDC	0.017749	0.073649	1	1107	-0.20117	2
RPL23A	0.017761	0.073649	1	1109	-0.83843	2
LRRC18	0.017788	0.073649	1	1111	0.30639	4
LILRA3	0.01784	0.07365	1	1114	-0.29125	2
MLN	0.017881	0.07365	1	1117	-0.18333	3
hsa-mir-19b-2	0.027209	0.073768	1	1580	-0.26558	1
hsa-mir-410	0.027263	0.073768	1	1582	0.78014	3
RPL17-C18orf32	0.067966	0.073899	1	3097	0.86248	1
UBR5	0.015283	0.073961	1	997	0.34051	4
TMPRSS11F	0.01536	0.073961	1	999	0.30561	4
TTLL2	0.015385	0.073961	1	1001	0.26346	3
E2F2	0.015409	0.073961	1	1003	0.21503	4
OR7E24	0.015418	0.073961	1	1004	0.25898	4
ZNF709	0.015532	0.073961	1	1007	0.22661	4
PCDHB8	0.015597	0.073961	1	1009	0.21455	4
FCER2	0.018025	0.073981	1	1122	-0.047451	3
KCNH6	0.018113	0.073981	1	1128	0.10543	4
hsa-mir-548ad	0.027699	0.07425	1	1600	-0.04113	2
GATA6	0.018159	0.074336	1	1129	-0.81512	1
hsa-mir-4300	0.031832	0.074474	1	1786	-0.61329	1
MUCL1	0.018248	0.074687	1	1138	-0.032767	3
TAPT1	0.01825	0.074687	1	1139	-0.34571	2
HLA-A	0.018262	0.074687	1	1140	-0.086669	3
SVEP1	0.018346	0.074687	1	1142	0.25289	3
ZNF891	0.018364	0.074687	1	1143	-0.0974	3
KLF11	0.018385	0.074687	1	1146	0.19047	3
TMEFF2	0.018478	0.074687	1	1150	0.17867	4
hsa-mir-1302-8	0.027972	0.074752	1	1611	-0.33962	2
TMEM171	0.015794	0.074754	1	1015	0.28889	5
PLEKHO2	0.015805	0.074754	1	1016	0.34279	5
GMPR2	0.018569	0.075039	1	1154	0.15907	4
CXCR6	0.015843	0.075193	1	1018	-0.35888	3
LURAP1	0.015878	0.07565	1	1020	0.24814	4
NCK2	0.015894	0.07565	1	1021	0.29787	4
CCR2	0.015906	0.07565	1	1022	-0.39169	2
TTF2	0.015906	0.07565	1	1023	-0.31048	2
NLRP3	0.015906	0.07565	1	1024	0.17578	4
SPAG4	0.015906	0.07565	1	1025	-0.042282	3
SLC23A2	0.015906	0.07565	1	1026	0.25367	4
HEATR3	0.015906	0.07565	1	1027	-0.38215	1
AKT2	0.015906	0.07565	1	1028	0.14172	4
RASSF9	0.015906	0.07565	1	1029	-0.18422	2
GTF2H1	0.015906	0.07565	1	1030	-0.19563	1
KLHL17	0.015913	0.07565	1	1031	0.56501	5
hsa-mir-1245a	0.029278	0.075714	1	1667	-0.47428	1
SUMO1	0.021111	0.075759	1	1285	-0.24972	3
hsa-mir-3130-1	0.021125	0.07576	1	1287	0.32993	4
hsa-mir-376c	0.070112	0.075901	1	3176	-0.85891	1
PDLIM4	0.015985	0.076087	1	1032	0.65804	4
ESPNL	0.016066	0.076087	1	1035	0.3683	5
PLEKHM3	0.018734	0.076446	1	1158	-0.26041	3
MMS19	0.018751	0.076446	1	1161	-0.11014	2
GPR22	0.018772	0.076447	1	1162	0.13912	4
SEC14L5	0.018797	0.076447	1	1163	0.011783	3
hsa-mir-1273d	0.030257	0.076718	1	1715	-0.34787	2
hsa-mir-128-2	0.030583	0.076718	1	1733	-0.46083	1
AGR2	0.018873	0.076807	1	1167	0.33224	4
ZDHHC8	0.018908	0.076807	1	1169	-0.2651	3
GNG11	0.018911	0.076807	1	1171	-0.23303	2
LOC643355	0.016094	0.076871	1	1036	0.36739	4
LRRC33	0.02127	0.077113	1	1294	0.057371	3
U2SURP	0.021397	0.077113	1	1299	-0.087904	3
PAGE5	0.019022	0.077154	1	1175	0.49886	4
KIAA1024	0.01907	0.077154	1	1179	-0.30797	2
CDX1	0.019441	0.077155	1	1196	-0.10786	3
SLC26A11	0.019459	0.077155	1	1197	-0.051778	3
hsa-mir-4476	0.031021	0.077199	1	1755	0.33712	2
CPZ	0.019617	0.077521	1	1205	-0.14383	2
RHBDF1	0.019617	0.077521	1	1206	0.11398	5
BYSL	0.019617	0.077521	1	1207	-0.042401	2
SH3D21	0.019617	0.077521	1	1208	-0.56947	2
DYRK1A	0.019617	0.077521	1	1209	-0.17246	3
RAET1L	0.019617	0.077521	1	1210	-0.31669	2
SAT2	0.021469	0.077563	1	1303	0.15777	4
PSTPIP2	0.016185	0.077834	1	1039	0.278	4
FCRL1	0.016198	0.077834	1	1040	0.22295	5
OR5P3	0.016265	0.077834	1	1042	0.52324	4
RNF135	0.016282	0.077834	1	1045	-0.14793	3
CYP2B6	0.016333	0.077835	1	1046	0.30669	4
RNF149	0.016489	0.077835	1	1048	0.31553	4
ITGB1BP2	0.016498	0.077835	1	1049	0.20386	3
FAR1	0.016563	0.078285	1	1052	-0.02449	3
ZFP91	0.016624	0.078285	1	1053	0.36549	4
MORN4	0.016624	0.078285	1	1054	0.56233	5
TNFRSF4	0.016659	0.078286	1	1055	0.54196	4
CHGA	0.016718	0.078286	1	1056	0.37707	4
ONECUT3	0.016782	0.078286	1	1058	-0.25322	1
GOLGA8B	0.03433	0.078312	1	1884	-0.85891	2
BAMBI	0.016793	0.078632	1	1060	0.20193	4
BAIAP2L2	0.016839	0.078632	1	1064	-0.23452	3
ZNF326	0.016843	0.078632	1	1065	-0.035821	3
MAG	0.019857	0.07878	1	1216	-0.31859	2
GCSAM	0.019863	0.07878	1	1217	0.19501	4
LZTS2	0.021853	0.078964	1	1324	-0.28037	2
PPIAL4E	0.021907	0.078964	1	1326	0.67917	3
GRIN3B	0.01697	0.079104	1	1066	0.30912	4
FAM76A	0.01699	0.079104	1	1067	0.263	5
SLAIN1	0.017001	0.079104	1	1069	0.093343	3
PROP1	0.017055	0.079104	1	1071	-0.38762	2
CLDN8	0.01711	0.07956	1	1072	-0.090294	2
BCKDK	0.017123	0.07956	1	1073	-0.14358	2
ATP9A	0.017151	0.07956	1	1075	0.36235	4
ASB15	0.017242	0.07956	1	1078	0.38659	4
FGR	0.017262	0.07956	1	1079	0.28124	4
MPP6	0.017266	0.07956	1	1081	0.29987	4
SCEL	0.019962	0.079953	1	1225	-0.42686	2
VDR	0.020199	0.079953	1	1231	-0.13636	3
KCNJ16	0.020246	0.079953	1	1234	0.097886	3
CCDC42B	0.020254	0.079953	1	1235	-0.47122	2
HS1BP3	0.020349	0.079953	1	1240	0.26592	4
BCL10	0.020416	0.079953	1	1243	0.32321	4
ZNF160	0.020449	0.079953	1	1246	0.092923	3
ICMT	0.017293	0.080052	1	1083	0.2625	5
COL9A1	0.017325	0.080052	1	1085	0.31377	4
RBP7	0.020499	0.080337	1	1250	0.23075	3
SEMA4C	0.020572	0.080337	1	1253	-0.35828	2
FKBP7	0.020582	0.080337	1	1255	0.27805	4
PAPSS2	0.020625	0.080337	1	1256	0.12221	3
TOP2B	0.020657	0.080337	1	1258	0.043116	3
LOX	0.020663	0.080337	1	1261	-0.19085	2
ZACN	0.020665	0.080337	1	1262	0.12872	3
ZNF441	0.020709	0.080337	1	1265	0.032691	3
CASKIN1	0.02078	0.080749	1	1270	0.46471	4
UNC5C	0.020789	0.080749	1	1271	0.23167	4
CNN1	0.017493	0.080881	1	1092	-0.69486	2
SNPH	0.017548	0.080881	1	1093	-0.13559	3
EXD1	0.017602	0.080882	1	1098	-0.30934	2
GPA33	0.017624	0.081373	1	1099	0.20528	5
TXNRD3NB	0.017639	0.081374	1	1100	0.14265	3
FBXO45	0.020845	0.081607	1	1273	-0.2532	3
ICAM1	0.017654	0.081699	1	1101	0.073226	4
HEATR5B	0.020965	0.082019	1	1277	0.13439	4
MRGPRX3	0.021023	0.08202	1	1280	-0.29555	3
NCDN	0.021027	0.08202	1	1281	-0.073605	3
LOC283710	0.022122	0.082338	1	1338	-0.10468	3
hsa-mir-6757	0.022199	0.082339	1	1343	0.030633	2
hsa-mir-922	0.022203	0.082339	1	1344	0.59298	3
TUBB6	0.02111	0.082448	1	1284	0.14305	3
EXOG	0.021186	0.082448	1	1289	-0.7523	2
ARL11	0.021186	0.082448	1	1290	-0.17874	2
WDR47	0.017818	0.082644	1	1112	0.25333	4
TIMM21	0.017838	0.082644	1	1113	0.55784	5
FAM168B	0.017858	0.082645	1	1115	0.33031	4
CDA	0.017876	0.082645	1	1116	-0.14774	3
IRGQ	0.022261	0.08282	1	1345	-0.4056	2
BTN1A1	0.021249	0.082879	1	1293	0.16237	4
RPRML	0.021357	0.082879	1	1296	-0.69545	2
CDY2A	0.02138	0.082879	1	1297	0.18954	4
VAC14	0.021391	0.082879	1	1298	-0.17488	3
CLEC4D	0.021498	0.08288	1	1306	0.13886	3
SEC22C	0.021527	0.08288	1	1308	-0.72455	1
CYTIP	0.021573	0.08288	1	1309	-0.60976	2
TM4SF4	0.021618	0.08288	1	1312	0.25311	5
PMPCB	0.033299	0.083023	1	1846	-0.33505	3
NHLH2	0.017925	0.083165	1	1118	0.41657	4
FAM47E	0.01793	0.083165	1	1119	-0.12275	2
LIN9	0.017985	0.083166	1	1121	0.2213	4
EMC7	0.022329	0.083276	1	1349	0.033562	3
hsa-mir-5587	0.022437	0.083276	1	1357	0.39876	4
SMARCAL1	0.018067	0.083677	1	1125	0.23802	3
ANKRA2	0.018094	0.083677	1	1126	-0.0050136	3
FBXO32	0.018109	0.083677	1	1127	0.085329	3
GAS2	0.018175	0.083677	1	1131	-0.12144	3
OR10A2	0.018175	0.083677	1	1132	-0.059561	3
TBX1	0.018175	0.083677	1	1133	0.28239	4
TAS2R39	0.018175	0.083677	1	1134	0.016936	3
OR52L1	0.018175	0.083677	1	1135	-0.13427	2
MESDC1	0.018204	0.083677	1	1136	0.12468	4
PADI4	0.021754	0.08374	1	1315	-0.05209	2
BTF3L4	0.021783	0.08374	1	1317	0.037281	3
PRELID1	0.0218	0.08374	1	1318	-0.22163	3
DUS2	0.021807	0.08374	1	1320	0.49722	3
CREB3L3	0.021843	0.08374	1	1323	-0.20794	2
RNF114	0.021933	0.083741	1	1331	-0.019367	3
CD37	0.02202	0.083741	1	1334	-0.26691	3
ENTPD1	0.022027	0.083741	1	1335	-0.15358	2
TSPO	0.022058	0.083741	1	1337	-0.098414	3
hsa-mir-29a	0.022744	0.083775	1	1369	-0.54799	1
hsa-mir-5682	0.022802	0.083775	1	1372	0.30303	2
C14orf105	0.018368	0.084025	1	1144	0.074915	4
ATP7B	0.018368	0.084025	1	1145	0.57645	4
ZPBP2	0.022262	0.084189	1	1346	0.002673	3
ACKR4	0.022302	0.084189	1	1347	-0.24438	2
ARFGEF1	0.022314	0.084189	1	1348	0.18705	3
PNRC1	0.022341	0.084189	1	1350	-0.50374	2
WDR48	0.022391	0.084189	1	1353	0.033048	3
SOX2	0.022404	0.084189	1	1354	-0.29244	2
G6PC	0.022459	0.084189	1	1358	-0.41157	2
hsa-mir-548h-2	0.034899	0.084649	1	1901	-0.78704	1
ATP1A4	0.022539	0.084653	1	1360	-0.34782	2
PLB1	0.022658	0.084654	1	1365	-0.32784	2
VCAN	0.022674	0.084654	1	1367	0.13985	3
M6PR	0.018468	0.084717	1	1148	0.37841	4
KRT10	0.018477	0.084717	1	1149	-0.1441	2
ZNF415	0.018532	0.084717	1	1153	0.35005	4
hsa-mir-4285	0.036567	0.085263	1	1974	-0.14361	2
SAMD9L	0.022845	0.085593	1	1374	-0.45735	1
ITGB4	0.022864	0.085593	1	1375	0.29233	5
TAF1	0.022901	0.085593	1	1377	0.36058	4
KMO	0.018702	0.085976	1	1157	0.33725	4
USP42	0.01875	0.085976	1	1160	-0.24905	2
DHRS7C	0.022981	0.086049	1	1379	-0.37355	2
TBCA	0.023871	0.086165	1	1426	-0.85891	1
HPCA	0.023871	0.086165	1	1427	-0.044542	1
hsa-mir-3650	0.023871	0.086165	1	1428	0.27989	2
TAF11	0.023884	0.086165	1	1429	0.14039	4
KIFC2	0.018836	0.0865	1	1164	-0.022298	3
GAS2L3	0.018859	0.0865	1	1166	0.4497	4
GDAP2	0.01891	0.086501	1	1170	0.31285	4
WDTC1	0.018925	0.086501	1	1172	-0.54279	2
SLC7A14	0.018935	0.086501	1	1173	0.087366	3
P2RY1	0.018978	0.086501	1	1174	0.14808	3
ITGA10	0.023118	0.086961	1	1383	0.1226	3
HMOX1	0.019041	0.087024	1	1176	0.60215	4
FAM65A	0.019055	0.087024	1	1177	0.37351	5
ALG9	0.019102	0.087024	1	1180	-0.0080257	3
RNF126	0.019116	0.087024	1	1181	0.13142	3
AP1M1	0.024501	0.087163	1	1455	0.19261	3
hsa-mir-6873	0.03773	0.087272	1	2017	-0.85891	1
LRFN1	0.023162	0.087422	1	1384	0.049528	3
SLC16A13	0.019148	0.087564	1	1182	-0.17137	3
SMCO3	0.019213	0.087564	1	1183	0.37745	4
ACCS	0.019214	0.087564	1	1184	-0.25378	2
C13orf45	0.019214	0.087564	1	1185	-0.40879	1
FAM103A1	0.019214	0.087564	1	1186	-0.16181	3
HEPACAM	0.019214	0.087564	1	1187	0.015024	3
FBXO24	0.019214	0.087564	1	1188	-0.046659	3
APOBR	0.019214	0.087564	1	1189	-0.4524	1
RPL28	0.019214	0.087564	1	1190	-0.78063	1
PAK6	0.019261	0.087564	1	1191	0.34743	4
TGM4	0.01927	0.087564	1	1192	0.26393	6
hsa-mir-4440	0.024578	0.087667	1	1458	-0.25341	2
SLC7A4	0.023265	0.087921	1	1389	0.21594	4
EN2	0.02328	0.087921	1	1390	0.067575	3
ITIH4	0.023389	0.087921	1	1398	0.29826	5
ACSL6	0.023491	0.087922	1	1402	0.2286	4
AP1G2	0.023531	0.087922	1	1410	-0.14252	3
OR2T11	0.023547	0.087922	1	1411	0.13147	5
OBP2A	0.023684	0.087922	1	1414	-0.1779	2
KCNH5	0.023684	0.087922	1	1415	-0.18423	2
TTC17	0.023684	0.087922	1	1416	-0.26332	1
LPO	0.023684	0.087922	1	1417	-0.44919	1
CCDC126	0.023684	0.087922	1	1418	-0.11381	3
MPP7	0.023684	0.087922	1	1419	-0.29594	1
CSAD	0.019275	0.087953	1	1193	0.25654	4
NDUFB11	0.02487	0.088175	1	1470	-0.64859	2
PLAA	0.023798	0.088401	1	1421	0.10321	3
NUDC	0.02383	0.088402	1	1422	-0.20229	3
PRKD3	0.023842	0.088402	1	1425	0.32081	4
PCDH7	0.019439	0.088508	1	1195	0.40233	5
GJA8	0.023978	0.088859	1	1431	0.040526	3
DRD3	0.019462	0.089002	1	1198	-0.37783	2
TG	0.025197	0.089059	1	1482	-0.74969	1
ELF2	0.025307	0.089059	1	1489	0.14385	4
TRIM64B	0.025324	0.089059	1	1490	0.2399	3
LRFN5	0.024131	0.089365	1	1433	0.098676	3
CES3	0.024189	0.089365	1	1436	-0.28146	2
COLQ	0.019572	0.089507	1	1201	0.33307	4
RBM12	0.019586	0.089507	1	1203	0.20872	4
TAF7L	0.019661	0.089507	1	1211	-0.30677	2
RBM46	0.019673	0.089507	1	1212	0.21377	4
MLF1	0.019679	0.089507	1	1213	0.06187	3
PUS1	0.019733	0.089507	1	1214	-0.18611	2
CXXC5	0.01987	0.089507	1	1218	-0.20693	3
NAMPT	0.019877	0.089507	1	1219	-0.22641	3
TMEM177	0.019888	0.089507	1	1220	0.28335	5
SP6	0.019897	0.089507	1	1221	-0.19896	3
SLC15A3	0.019923	0.089507	1	1222	0.44925	5
C6orf47	0.019928	0.089507	1	1223	0.044447	3
TMEM8C	0.019961	0.089507	1	1224	0.14688	4
ASCL3	0.020006	0.089507	1	1227	0.30971	4
CBX7	0.020061	0.089507	1	1228	0.12467	4
CELF4	0.020081	0.089507	1	1229	-0.070102	3
C10orf118	0.020115	0.089507	1	1230	0.051919	3
hsa-mir-3188	0.036091	0.089544	1	1959	0.28759	3
EBLN2	0.024229	0.089879	1	1438	-0.21877	1
hsa-mir-539	0.025777	0.090102	1	1514	0.37381	3
GABRR2	0.025814	0.090102	1	1517	-0.12232	3
BEX2	0.024283	0.090337	1	1441	-0.10009	2
ZSCAN30	0.024472	0.090337	1	1452	0.14404	3
LYPD6B	0.024558	0.090337	1	1457	0.14003	3
ABCA1	0.02024	0.090534	1	1233	0.10204	4
hsa-mir-7856	0.036785	0.090665	1	1987	0.36961	2
hsa-mir-4674	0.037259	0.090665	1	2001	-0.14596	2
ANXA8L1	0.037471	0.090665	1	2009	-0.99133	1
KLF3	0.024597	0.09085	1	1460	0.10019	3
CPT1C	0.024772	0.09085	1	1465	-0.51434	2
PROL1	0.024791	0.09085	1	1466	0.20878	3
DLX1	0.024791	0.09085	1	1467	0.35517	4
PXN	0.024795	0.09085	1	1468	-0.003443	3
ADH6	0.024931	0.09085	1	1472	-0.022279	3
TMC3	0.024977	0.09085	1	1473	-0.3575	2
PNMA1	0.025095	0.09085	1	1478	0.23493	5
TBC1D2B	0.025199	0.09085	1	1483	0.19966	4
TBX19	0.025249	0.09085	1	1484	-0.64891	2
ASPHD2	0.025294	0.09085	1	1488	0.092668	3
LY6G6F	0.025358	0.09085	1	1493	0.10272	5
DHRS13	0.02543	0.09085	1	1498	-0.49105	1
APOBEC1	0.025488	0.09085	1	1500	0.36039	4
ALDOC	0.02551	0.09085	1	1502	0.12045	3
COPB1	0.020279	0.090899	1	1236	-0.31374	1
TUBA1A	0.020313	0.091265	1	1238	0.43091	4
CXCL11	0.020333	0.091771	1	1239	0.25642	4
MPST	0.020384	0.091771	1	1241	0.34857	4
hsa-mir-4431	0.03812	0.091798	1	2026	0.29226	2
LRP4	0.02578	0.09186	1	1515	0.16366	4
CXorf66	0.02041	0.092334	1	1242	0.36605	4
EZH2	0.020426	0.092334	1	1244	0.22502	3
OR5A2	0.020443	0.092334	1	1245	-0.094601	3
STXBP5	0.020456	0.092334	1	1247	0.05135	3
MTMR10	0.020465	0.092334	1	1248	-0.076643	3
CRTC3	0.02048	0.092334	1	1249	-0.12879	3
CARD10	0.020532	0.092334	1	1251	0.15715	3
C15orf27	0.020555	0.092334	1	1252	0.32207	4
OR6B3	0.020631	0.0929	1	1257	-0.064981	3
hsa-mir-6516	0.039445	0.09299	1	2085	-0.1775	2
hsa-mir-6512	0.039445	0.09299	1	2086	-0.33789	2
hsa-mir-596	0.039445	0.09299	1	2087	-1.0862	1
hsa-mir-4791	0.039445	0.09299	1	2088	0.17472	3
hsa-mir-8085	0.039445	0.09299	1	2089	-0.64515	1
hsa-mir-4489	0.039582	0.092991	1	2094	0.11301	2
HSF1	0.026565	0.093094	1	1543	-0.49737	2
hsa-mir-1264	0.026971	0.093095	1	1565	0.6785	3
C10orf10	0.020658	0.093434	1	1259	0.34096	4
DBT	0.020661	0.093434	1	1260	-0.32335	1
RSAD1	0.020672	0.093434	1	1263	0.27768	4
RGS17	0.020672	0.093434	1	1264	0.51642	4
GREM2	0.020715	0.093434	1	1266	-0.065224	2
PLCD1	0.020741	0.093434	1	1267	0.21127	4
MNT	0.020754	0.093434	1	1268	0.35662	5
SPATA31D1	0.02077	0.093434	1	1269	0.16233	3
TBX20	0.020824	0.093785	1	1272	0.090835	3
PPM1J	0.020879	0.093785	1	1274	-0.25635	2
CD27	0.020945	0.093785	1	1276	0.38076	4
hsa-mir-4290	0.04066	0.094147	1	2126	-0.0926	2
AJUBA	0.027785	0.094706	1	1602	-0.19012	3
TMEM89	0.027808	0.094706	1	1603	-0.85427	2
GP1BA	0.027831	0.094706	1	1604	-0.29836	3
IL17B	0.020979	0.094737	1	1278	0.15064	3
TRIM42	0.020984	0.094737	1	1279	-0.0032801	3
LIFR	0.02107	0.09526	1	1282	-0.28516	1
NUDT15	0.021077	0.09526	1	1283	0.3456	4
SNTA1	0.021123	0.09526	1	1286	0.28246	5
CD160	0.021152	0.095813	1	1288	-0.080714	3
C8orf44-SGK3	0.040714	0.09594	1	2131	-0.094715	2
PLEKHG2	0.028054	0.09625	1	1614	0.017207	3
hsa-mir-505	0.028068	0.09625	1	1617	0.25415	2
ASF1A	0.025928	0.096264	1	1519	-0.39017	3
SLAIN2	0.026019	0.096265	1	1522	-0.44668	1
SLC26A2	0.026062	0.096265	1	1524	0.24331	4
ABCC10	0.021236	0.096393	1	1292	-0.040992	3
DNASE1	0.021292	0.096394	1	1295	-0.39051	2
hsa-mir-454	0.040885	0.096541	1	2137	-0.022068	2
RCSD1	0.026109	0.096768	1	1529	-0.51687	1
FRG1	0.026169	0.096768	1	1530	-0.45961	2
GPC5	0.021408	0.096782	1	1300	0.26765	5
C12orf29	0.021439	0.096782	1	1301	0.39108	4
VAMP4	0.028236	0.096792	1	1623	-0.057789	3
IDI2	0.021461	0.09735	1	1302	-0.030027	3
OR4D6	0.021479	0.09735	1	1304	-0.023216	3
RREB1	0.021491	0.09735	1	1305	0.45926	4
TEDDM1	0.0215	0.09735	1	1307	-0.082117	3
VGLL4	0.021584	0.09735	1	1310	0.01293	4
HIC1	0.021593	0.09735	1	1311	-0.040012	3
CLDN24	0.021631	0.097351	1	1313	0.27614	4
CCDC159	0.021739	0.097351	1	1314	0.30889	5
PKD2L2	0.028459	0.09737	1	1638	-0.51336	1
THBS2	0.021763	0.097921	1	1316	-0.075917	3
KIAA0895L	0.028858	0.098389	1	1653	-0.15287	2
LRRTM3	0.02893	0.098389	1	1657	-0.58349	2
PPY	0.029039	0.098389	1	1660	-0.47716	2
hsa-mir-340	0.042643	0.098419	1	2202	-1.1276	1
hsa-mir-4470	0.043626	0.098419	1	2244	-0.34454	2
hsa-mir-4725	0.043788	0.098419	1	2250	-1.1794	1
FAM166B	0.021806	0.098523	1	1319	0.054041	3
CSF2RA_X	0.02181	0.098523	1	1321	0.27403	5
GAS2L2	0.021839	0.09891	1	1322	-0.18808	2
hsa-mir-133a-1	0.029348	0.098961	1	1670	0.54921	3
SFN	0.029437	0.098962	1	1676	-0.36585	3
FAM162A	0.021896	0.099288	1	1325	0.049734	3
IGFBP6	0.029549	0.099537	1	1680	-0.18866	3
LOC100131094	0.029553	0.099537	1	1682	0.12055	3
PALM2-AKAP2	0.086587	0.099832	1	3743	0.50561	1
C1orf227	0.021915	0.099853	1	1327	-0.062339	3
LEMD1	0.021915	0.099853	1	1328	-0.043616	2
MPL	0.021921	0.099853	1	1329	0.21185	4
FAXC	0.021969	0.10044	1	1332	0.30513	4
ZNF713	0.021972	0.10044	1	1333	0.13063	3
TEAD2	0.022048	0.10044	1	1336	0.18149	3
PRKCG	0.022136	0.10083	1	1339	0.23879	5
CDH20	0.022144	0.10083	1	1340	-0.103	3
SAG	0.022186	0.10083	1	1341	0.30362	4
B3GAT2	0.022187	0.10083	1	1342	0.11155	4
PAG1	0.026413	0.10116	1	1537	0.18893	4
SEMA6D	0.026472	0.10116	1	1538	0.041165	4
ZFAND2A	0.026548	0.10116	1	1541	0.10719	3
AMBRA1	0.026562	0.10116	1	1542	-0.24852	2
NPB	0.026607	0.10116	1	1547	-0.13325	2
EFHD1	0.026698	0.10116	1	1551	-0.90762	2
LDHB	0.02671	0.10116	1	1552	0.14653	4
COL20A1	0.030149	0.10117	1	1712	-0.29608	3
PURB	0.026879	0.10167	1	1560	0.1612	4
TOR1AIP1	0.026914	0.10167	1	1561	-0.066197	3
DIRAS2	0.026918	0.10167	1	1562	-0.25917	2
LCE5A	0.027039	0.10167	1	1568	0.24507	4
hsa-mir-6806	0.044582	0.10174	1	2270	0.26544	3
C12orf71	0.030368	0.1018	1	1720	-0.32136	3
WIF1	0.02235	0.10181	1	1351	-0.35985	3
LY86	0.022355	0.10181	1	1352	0.19624	4
ABCD3	0.022405	0.10181	1	1355	-0.48581	2
PRSS48	0.02241	0.10181	1	1356	0.30387	4
NEK3	0.022568	0.10181	1	1361	0.23014	4
BAG2	0.022575	0.10181	1	1362	0.19972	4
FOXN1	0.027105	0.10217	1	1571	0.024851	3
ETV2	0.027105	0.10217	1	1572	0.045932	4
PKIG	0.027184	0.10217	1	1579	-0.081393	3
HEYL	0.030684	0.10281	1	1741	-0.13125	3
ADAMTS18	0.031001	0.10281	1	1754	0.25214	4
NOP9	0.031028	0.10281	1	1756	-0.28534	2
hsa-mir-4652	0.031172	0.10281	1	1764	-1.0598	1
UCK2	0.022603	0.10283	1	1363	0.25713	4
hsa-mir-3925	0.045265	0.103	1	2297	-0.024445	2
hsa-mir-520c	0.045439	0.103	1	2306	0.55365	2
PYY	0.027407	0.1032	1	1585	-0.16571	3
CELA2B	0.027434	0.1032	1	1586	0.15781	4
MSI1	0.022652	0.10334	1	1364	0.38056	4
SIGLEC15	0.022671	0.10334	1	1366	0.21646	4
C19orf59	0.022717	0.10334	1	1368	0.11494	3
NACAD	0.022773	0.10334	1	1370	0.1989	5
TP73	0.022786	0.10334	1	1371	0.30732	5
UAP1L1	0.022835	0.10428	1	1373	-0.071878	3
BRSK2	0.022898	0.10428	1	1376	0.35498	4
DYRK1B	0.022932	0.10428	1	1378	-0.40489	2
CC2D1B	0.023038	0.10468	1	1381	0.24586	4
WDR60	0.023068	0.10468	1	1382	0.38014	5
hsa-mir-4447	0.042035	0.10469	1	2172	-0.84823	1
C11orf88	0.023193	0.10531	1	1385	0.47355	5
PACS1	0.023243	0.10531	1	1386	0.12996	3
OR6F1	0.023248	0.10531	1	1387	0.46122	4
SLC43A2	0.023253	0.10531	1	1388	-0.31193	3
MAX	0.02335	0.10531	1	1391	0.32076	3
GZMB	0.023385	0.10531	1	1393	0.83315	3
PTPRQ	0.023385	0.10531	1	1394	0.56772	4
SLC25A45	0.023385	0.10531	1	1395	0.45662	5
FBXL4	0.023385	0.10531	1	1396	0.25622	3
OR52B4	0.023385	0.10531	1	1397	0.25553	4
ITM2C	0.023399	0.10531	1	1399	0.25785	4
PDGFC	0.023458	0.10531	1	1401	0.10217	3
ZNF142	0.023494	0.10598	1	1403	-0.054195	2
GAB3	0.023494	0.10598	1	1404	-0.22286	1
PPIE	0.023494	0.10598	1	1405	0.094595	3
SPATA12	0.023494	0.10598	1	1406	0.068919	3
CPLX1	0.023494	0.10598	1	1407	0.13717	4
TMEM63A	0.023494	0.10598	1	1408	-0.16776	2
TIMM8A	0.023494	0.10598	1	1409	0.017923	3
DDR1	0.023605	0.10598	1	1413	-0.15094	2
C20orf78	0.023754	0.10598	1	1420	0.051397	3
INHBB	0.02384	0.10598	1	1423	0.38713	4
DTNBP1	0.023841	0.10598	1	1424	0.051736	3
CCM2	0.023944	0.10653	1	1430	-0.56282	2
ZCCHC3	0.024009	0.10653	1	1432	0.27187	4
CDK18	0.032184	0.1066	1	1805	-0.083211	3
RGMA	0.032278	0.1066	1	1809	0.17238	4
MRPS9	0.046371	0.107	1	2335	-1.7202	1
hsa-mir-3184	0.046694	0.107	1	2346	-1.3209	1
MAEA	0.027659	0.10711	1	1597	-0.34512	2
PPP4R1	0.027693	0.10711	1	1599	0.01808	3
DFFB	0.027874	0.10764	1	1608	-0.035379	3
PDIA4	0.027885	0.10764	1	1609	0.33647	4
BIN2	0.027985	0.10764	1	1612	0.15977	3
RRP1B	0.028055	0.10764	1	1615	-0.80393	2
PRR3	0.0281	0.10764	1	1618	-0.41811	2
OR8H2	0.028129	0.10764	1	1619	0.026897	3
SPATA6	0.028191	0.10764	1	1621	-0.20245	2
ANKRD24	0.028236	0.10764	1	1622	-0.18929	3
EBF1	0.024177	0.10776	1	1434	0.20355	4
CBY3	0.024187	0.10776	1	1435	-0.053495	3
NPR1	0.024201	0.10776	1	1437	-0.071172	2
RASGRP4	0.024259	0.10776	1	1439	0.37873	4
TRIM43B	0.028317	0.10789	1	1624	-0.32638	3
NCSTN	0.028607	0.10814	1	1643	0.17705	5
CRTC1	0.024276	0.10816	1	1440	-0.055599	2
STON1-GTF2A1L	0.042796	0.1082	1	2210	-0.33006	1
ZFHX2	0.024306	0.10856	1	1442	0.12502	4
IRS1	0.02431	0.10856	1	1443	-0.039552	2
ARAP2	0.024333	0.10856	1	1444	0.31338	3
JPH2	0.024412	0.10856	1	1447	0.076272	3
MAP1LC3A	0.02442	0.10856	1	1448	-0.8133	2
PDZRN3	0.024445	0.10856	1	1449	0.15656	4
FBXO17	0.024445	0.10856	1	1450	0.073479	4
MALT1	0.024465	0.10856	1	1451	0.17515	3
COLEC11	0.024485	0.10856	1	1453	0.089276	3
MTA1	0.02449	0.10856	1	1454	0.51344	5
SNUPN	0.024527	0.10856	1	1456	-0.33868	2
hsa-mir-4254	0.032607	0.10885	1	1821	0.65468	3
ATRX	0.028643	0.1092	1	1644	-0.10378	2
POTEG	0.043629	0.10929	1	2245	0.22181	2
hsa-mir-1270-1	0.032814	0.10947	1	1826	0.39035	3
hsa-mir-659	0.044069	0.1098	1	2261	-0.19846	2
SNX1	0.028744	0.11027	1	1648	-0.24352	2
RANBP17	0.028752	0.11027	1	1649	-0.18737	2
PAN3	0.028753	0.11027	1	1650	0.22332	4
MAPK8IP3	0.047251	0.11029	1	2360	-0.51278	2
MZT2B	0.04455	0.11034	1	2269	-0.85891	1
WFIKKN1	0.024653	0.1105	1	1461	0.064144	3
KIAA1467	0.024705	0.1105	1	1462	-1.0965	2
OR10H3	0.028914	0.1108	1	1655	-0.60856	2
hsa-mir-3163	0.093381	0.11087	1	3966	-0.85891	1
hsa-mir-4436a	0.047632	0.11094	1	2374	-0.024473	2
ALDH1L2	0.024727	0.11119	1	1463	0.015214	3
PRDX2	0.024756	0.11119	1	1464	0.22389	6
KRT80	0.024834	0.11119	1	1469	0.26965	4
RBMS2	0.02487	0.11119	1	1471	-0.12916	2
hsa-mir-1-1	0.033266	0.11129	1	1844	0.0037914	2
hsa-mir-4650-2	0.04801	0.11158	1	2388	0.80226	3
PNKP	0.025016	0.11174	1	1474	-0.87879	1
LAMB1	0.029124	0.11188	1	1663	0.087447	4
C1orf116	0.029159	0.11188	1	1665	-0.13553	3
IPPK	0.029448	0.11241	1	1677	-0.11401	3
PPME1	0.025058	0.11244	1	1475	0.30583	5
BTK	0.025074	0.11244	1	1476	0.22845	5
MBNL2	0.025091	0.11244	1	1477	0.2624	5
ZYG11B	0.025098	0.11244	1	1479	0.062268	3
PDXK	0.033465	0.11291	1	1850	-0.54514	1
PTX3	0.03365	0.11291	1	1856	-0.1315	3
hsa-mir-8070	0.049088	0.11292	1	2432	0.61972	2
TTC31	0.029649	0.11296	1	1685	-0.13487	2
S1PR5	0.029749	0.11296	1	1689	-0.013549	3
ENPP4	0.029749	0.11296	1	1690	-0.21392	3
SYCN	0.029749	0.11296	1	1691	0.0085793	3
PTRHD1	0.029749	0.11296	1	1692	-0.29589	1
RHEB	0.029749	0.11296	1	1693	-0.13435	2
TMBIM4	0.029811	0.11296	1	1696	0.11848	3
MORF4L2	0.029838	0.11296	1	1698	0.12966	4
LPIN2	0.029895	0.11296	1	1699	0.30748	3
HNRNPR	0.030131	0.11353	1	1710	-0.0011313	3
FAM177B	0.030233	0.11353	1	1713	0.28337	4
FYCO1	0.033737	0.11355	1	1859	-0.017106	3
hsa-mir-498	0.033737	0.11355	1	1860	0.77111	3
hsa-mir-513a-1	0.034	0.11355	1	1867	0.71152	3
RHOA	0.030275	0.1141	1	1716	0.27475	4
GPHN	0.030314	0.1141	1	1718	-0.058856	3
EMG1	0.030377	0.1141	1	1723	0.01907	3
BCAR3	0.030636	0.1141	1	1736	0.14213	3
OR5M10	0.030674	0.1141	1	1739	-0.026408	3
EDEM3	0.03069	0.1141	1	1742	-0.10244	3
NMUR1	0.030715	0.1141	1	1744	0.19176	3
PTMS	0.030719	0.1141	1	1745	-0.20785	3
OSBPL3	0.03406	0.11419	1	1870	-0.32276	3
ATP6V1E2	0.025167	0.11436	1	1481	0.15859	3
MAGEB18	0.025264	0.11436	1	1485	0.44719	5
VMAC	0.025278	0.11436	1	1486	0.21639	4
ADAMTS1	0.025288	0.11436	1	1487	0.038122	3
ELOVL7	0.025328	0.11436	1	1491	0.10196	3
FSHR	0.025339	0.11436	1	1492	-0.057974	3
STC2	0.025358	0.11436	1	1494	0.34124	4
TBX5	0.025362	0.11436	1	1495	0.41681	4
SMPX	0.025369	0.11436	1	1496	0.021773	3
ST5	0.025369	0.11436	1	1497	0.24458	6
ZNF676	0.045689	0.11446	1	2311	0.39856	1
SLFN12	0.030855	0.11465	1	1750	-0.83168	1
C19orf80	0.034276	0.11469	1	1880	0.055342	3
hsa-mir-6763	0.034312	0.11469	1	1882	0.25643	3
SIGLEC5	0.025472	0.11477	1	1499	0.346	4
CLUH	0.025501	0.11477	1	1501	-0.7313	2
DCLK3	0.025515	0.11477	1	1503	0.20633	4
GNB2	0.025534	0.11478	1	1504	0.20446	4
NPRL3	0.025559	0.11478	1	1505	-0.33261	3
ST8SIA3	0.025572	0.11478	1	1506	0.012499	3
TEX38	0.025582	0.11478	1	1507	0.0078244	3
NFKBIA	0.031048	0.11522	1	1759	-0.10546	3
TMEM48	0.034778	0.11532	1	1897	0.45482	2
KLRC1	0.025668	0.11537	1	1509	-0.41536	2
PCSK6	0.025679	0.11537	1	1510	0.28112	4
UGT3A2	0.025679	0.11537	1	1511	0.33844	4
TP53TG3B	0.09642	0.11582	1	4050	0.28346	1
DHX8	0.025733	0.1161	1	1512	0.57502	3
MTMR2	0.025733	0.1161	1	1513	0.45569	4
hsa-mir-4638	0.050398	0.11626	1	2469	-0.26221	2
THY1	0.031267	0.11635	1	1767	0.083233	5
EFTUD2	0.031306	0.11635	1	1770	-0.49228	2
TMEM63B	0.025791	0.11651	1	1516	0.2577	5
hsa-mir-3907	0.051082	0.11696	1	2492	0.34713	2
CLEC1A	0.02592	0.11709	1	1518	0.35122	4
DCXR	0.025945	0.11709	1	1520	0.35734	4
SYAP1	0.026011	0.1175	1	1521	0.19895	4
EGFL8	0.026045	0.1175	1	1523	0.14128	3
RBAK	0.026082	0.1175	1	1525	0.22722	4
DISP1	0.026103	0.1175	1	1526	0.027419	3
hsa-mir-1911	0.051256	0.11765	1	2499	-1.1635	1
CCDC169-SOHLH2	0.031486	0.11805	1	1774	0.36196	4
C1orf65	0.0315	0.11805	1	1776	-0.27759	3
DDR2	0.031621	0.11805	1	1778	-0.19863	2
FAM115C	0.031666	0.11805	1	1779	0.18239	4
COX7A2	0.031802	0.11805	1	1785	0.27446	3
PMF1	0.031847	0.11805	1	1787	-0.59982	2
GABRA2	0.031937	0.11805	1	1795	-0.070843	2
ICOSLG	0.026106	0.11819	1	1527	0.43034	4
SLC44A2	0.026108	0.11819	1	1528	-0.52289	2
SLC4A1	0.026185	0.11819	1	1532	0.48914	4
PHF21A	0.026211	0.11819	1	1533	0.25927	6
TMSB4X	0.034944	0.1184	1	1902	0.59229	3
ACIN1	0.026389	0.11859	1	1536	-0.011374	3
FGFR2	0.026482	0.11859	1	1539	-0.62759	1
PI15	0.026486	0.11859	1	1540	0.23697	4
ZNF280D	0.026575	0.11859	1	1544	0.17363	4
MPZL1	0.026579	0.11859	1	1545	0.1556	4
CRYGD	0.026591	0.11859	1	1546	-0.4652	2
WDYHV1	0.026649	0.11859	1	1548	0.0053953	3
TOB1	0.026659	0.11859	1	1549	0.19287	3
TC2N	0.026672	0.11859	1	1550	-0.14192	1
EPHB3	0.026752	0.11859	1	1553	0.03805	3
UBXN6	0.026754	0.11859	1	1554	-0.023767	3
LHFPL3	0.026794	0.11859	1	1555	0.17173	4
C11orf1	0.026804	0.11859	1	1556	0.55447	4
TAS2R5	0.026835	0.11859	1	1557	0.05883	3
LILRA1	0.02685	0.11859	1	1558	0.49548	5
P2RY8_X	0.026856	0.11859	1	1559	0.15235	3
DDHD1	0.026919	0.11859	1	1563	0.15343	3
SMAD2	0.02697	0.11903	1	1564	-0.085684	3
CAPZB	0.03516	0.11903	1	1909	-0.33682	3
EFCAB14	0.035213	0.11903	1	1912	-0.43689	2
FAM47A	0.035257	0.11903	1	1916	0.10107	4
AP5B1	0.035369	0.11903	1	1922	0.002477	3
CALU	0.031968	0.11925	1	1798	0.10736	3
SPATA19	0.031978	0.11925	1	1799	0.2546	3
YBX3	0.032044	0.11925	1	1800	0.24023	4
TMEM164	0.03209	0.11925	1	1802	0.17934	4
SPINK9	0.026994	0.11945	1	1566	0.3017	5
TM4SF18	0.027025	0.11988	1	1567	-0.43286	1
SLC38A1	0.027051	0.11988	1	1569	0.37461	5
SEC24B	0.027079	0.11988	1	1570	0.16923	4
CLPSL1	0.032413	0.12038	1	1813	0.12948	3
C5orf28	0.032432	0.12038	1	1814	-0.54043	2
CRADD	0.027135	0.1209	1	1573	0.21713	6
STARD13	0.027136	0.1209	1	1574	0.1105	3
DHFRL1	0.027137	0.1209	1	1575	0.12834	3
SCIMP	0.027147	0.1209	1	1576	0.39188	4
OR5D18	0.027178	0.1209	1	1577	0.16303	4
LRRC29	0.02718	0.1209	1	1578	-0.0039013	3
HIGD1B	0.027212	0.1209	1	1581	0.16133	6
KLHDC9	0.032523	0.12093	1	1820	-0.24896	2
ZNF514	0.035789	0.12132	1	1953	0.15638	4
CALM2	0.032748	0.1215	1	1824	-0.24816	3
ZXDC	0.032838	0.1215	1	1828	-0.072419	3
RAG2	0.032876	0.1215	1	1830	-0.57705	2
IFT81	0.032894	0.1215	1	1831	-0.62822	2
CYFIP1	0.032923	0.1215	1	1833	0.0019793	3
DYX1C1	0.033108	0.1215	1	1839	-0.064332	2
AKIP1	0.033184	0.1215	1	1841	0.10695	3
LMX1B	0.03322	0.1215	1	1842	0.064668	3
P4HA2	0.033241	0.1215	1	1843	-0.22641	2
RBM20	0.033292	0.1215	1	1845	0.071182	3
PLEC	0.033378	0.1215	1	1848	-0.37079	3
TARSL2	0.03593	0.1218	1	1957	-0.29362	2
hsa-mir-1298	0.036241	0.1218	1	1964	0.15766	2
SLC39A4	0.036249	0.1218	1	1966	0.039218	3
NFIX	0.033558	0.12204	1	1853	-0.21415	2
PCSK7	0.033648	0.12204	1	1855	0.052132	3
ZNF648	0.033693	0.12204	1	1857	-0.069485	3
PROK2	0.027288	0.12211	1	1583	0.15904	4
HSBP1L1	0.027387	0.12211	1	1584	0.15224	4
hsa-mir-6807	0.051902	0.12242	1	2524	0.4003	3
RNF186	0.02746	0.12253	1	1587	-0.04673	3
HYAL1	0.027494	0.12253	1	1588	0.12914	3
PCOLCE	0.027499	0.12253	1	1589	0.18907	3
CRTAM	0.027509	0.12253	1	1590	0.41885	4
DHX34	0.027567	0.12253	1	1591	0.037764	4
ERCC8	0.027576	0.12253	1	1592	-0.20493	2
ACTN2	0.027616	0.12253	1	1593	0.36884	5
MAPKAPK2	0.027617	0.12253	1	1594	0.13664	3
FLJ44635	0.027622	0.12253	1	1595	0.044385	3
F2RL1	0.027676	0.12253	1	1598	-0.0056868	3
GID8	0.027724	0.12253	1	1601	-0.09355	3
TMED10	0.027839	0.12253	1	1605	0.22566	4
LRRC6	0.027845	0.12253	1	1606	0.26045	5
PLGRKT	0.027865	0.12253	1	1607	0.58847	5
FAM86B1	0.027907	0.12253	1	1610	0.2571	4
LEPREL1	0.028019	0.12253	1	1613	0.067876	3
KLHL11	0.028061	0.12253	1	1616	-0.17329	2
IFIT3	0.028189	0.12295	1	1620	-0.027673	3
GRM8	0.028353	0.12296	1	1625	-0.0084664	3
PPP2R5B	0.028353	0.12296	1	1626	0.11341	3
IL18BP	0.028353	0.12296	1	1627	0.025857	3
BCL2L15	0.028353	0.12296	1	1628	0.0032693	3
DENR	0.028353	0.12296	1	1629	-0.63676	1
NADK2	0.028353	0.12296	1	1630	-0.46657	2
S100B	0.028353	0.12296	1	1631	-0.63128	2
THUMPD1	0.028369	0.12296	1	1632	0.29878	5
PAGE4	0.028417	0.12296	1	1634	0.44991	4
C11orf31	0.028437	0.12296	1	1635	0.41693	4
HPS5	0.028441	0.12296	1	1636	0.12409	3
B3GALNT1	0.028448	0.12296	1	1637	-0.22619	3
TRPV3	0.02847	0.12296	1	1639	0.32332	4
HOXC12	0.028528	0.12296	1	1640	0.23257	4
C17orf70	0.028559	0.12296	1	1641	0.40642	4
GZMH	0.028584	0.12296	1	1642	-0.10405	3
MCU	0.033891	0.12385	1	1865	-0.27596	3
hsa-mir-4287	0.036581	0.12491	1	1975	0.22436	2
FHL3	0.036649	0.12491	1	1978	0.22758	4
SDSL	0.036725	0.12491	1	1986	-0.5788	1
FAM109B	0.02873	0.12501	1	1646	0.25897	5
SLTM	0.049826	0.12525	1	2450	0.3615	2
hsa-mir-548u	0.049851	0.12525	1	2451	-0.38468	2
NINJ1	0.028763	0.12537	1	1651	-0.04799	3
NUDT2	0.028766	0.12537	1	1652	0.21008	5
PLCH1	0.02888	0.12537	1	1654	0.18225	3
ZNF239	0.028922	0.12537	1	1656	-0.13766	2
CXCR3	0.028964	0.12537	1	1658	0.41125	6
KEAP1	0.029003	0.12537	1	1659	0.37182	4
EPHX3	0.029116	0.12537	1	1661	0.096272	3
SMOX	0.029116	0.12537	1	1662	-0.010733	2
NANOS1	0.029139	0.12537	1	1664	-0.088545	3
DMRTC1	0.029203	0.12537	1	1666	0.048982	3
F10	0.033987	0.12565	1	1866	0.62697	4
NR1H3	0.034092	0.12565	1	1872	0.1473	3
BECN1	0.03411	0.12565	1	1874	0.19728	5
CECR6	0.034223	0.12565	1	1877	-0.61187	2
IFI16	0.034233	0.12565	1	1878	0.17087	3
C9orf24	0.034233	0.12565	1	1879	-0.17442	2
QTRT1	0.034278	0.12565	1	1881	-0.26859	3
BPY2C	0.10332	0.12578	1	4260	0.22095	1
hsa-mir-194-1	0.036914	0.12607	1	1990	0.68529	3
FGF9	0.029301	0.12608	1	1668	0.23442	4
SLC6A5	0.029328	0.12608	1	1669	0.13042	5
RPS6KB1	0.029355	0.12608	1	1671	-0.11223	2
ENPP2	0.029369	0.12608	1	1672	0.15026	3
ITGB3	0.029385	0.12608	1	1673	-0.37299	2
NUP210	0.02941	0.12608	1	1675	0.023052	4
NUDT22	0.034501	0.12624	1	1889	-0.01252	3
DNMBP	0.034548	0.12624	1	1891	0.11731	3
SAP30BP	0.034585	0.12624	1	1893	0.21205	3
CLSPN	0.034593	0.12624	1	1894	0.071108	3
CMPK2	0.029465	0.1268	1	1678	0.41404	4
PRKAG1	0.029513	0.1268	1	1679	0.37324	5
TTLL11	0.029552	0.1268	1	1681	0.27347	5
COL6A3	0.029612	0.1268	1	1683	0.14208	4
TIMM8B	0.029626	0.1268	1	1684	-0.25515	2
CNR1	0.02966	0.1268	1	1686	0.1997	4
TESPA1	0.029734	0.1268	1	1687	-0.41415	2
TNP2	0.029745	0.1268	1	1688	0.50281	4
TCF20	0.029753	0.1268	1	1694	0.098617	4
MRS2	0.029789	0.1268	1	1695	-0.073147	3
VHL	0.029814	0.1268	1	1697	0.23359	5
OR13C8	0.029951	0.1268	1	1700	0.1468	3
GNG10	0.029965	0.1268	1	1701	-0.077158	3
EFCAB12	0.030005	0.1268	1	1702	-0.095327	2
MYH6	0.030011	0.1268	1	1703	0.28286	5
CDK5RAP2	0.030045	0.1268	1	1704	0.26907	4
PRB1	0.030059	0.1268	1	1705	0.10811	4
TRIM27	0.030112	0.1268	1	1706	-0.2046	3
GATA4	0.030113	0.1268	1	1707	0.023874	3
CYP51A1	0.030129	0.1268	1	1708	0.36117	6
CREB3L2	0.03013	0.1268	1	1709	0.27195	4
CCDC177	0.030142	0.1268	1	1711	0.32976	3
ZBTB22	0.034818	0.12684	1	1898	-0.31991	3
MECP2	0.034855	0.12684	1	1899	-0.029071	3
TMEM182	0.030255	0.12724	1	1714	0.16142	4
AP4E1	0.037063	0.12744	1	1993	-0.39188	3
hsa-mir-4778	0.03712	0.12744	1	1994	-0.59429	2
GLIPR1L2	0.037192	0.12744	1	1999	-0.34688	1
IL36A	0.034997	0.12745	1	1904	-0.47533	2
KRT2	0.035042	0.12745	1	1906	-0.70057	2
TFAP2A	0.035132	0.12745	1	1908	0.056257	3
FBXL22	0.035222	0.12745	1	1913	-0.059279	3
MCM9	0.035267	0.12746	1	1917	-0.51072	2
TIAM2	0.035328	0.12746	1	1919	0.092402	3
AHCYL1	0.035349	0.12746	1	1921	0.28176	4
MOB1A	0.035374	0.12746	1	1923	0.20943	4
BEND6	0.035387	0.12746	1	1925	0.055111	3
NRG2	0.030298	0.1277	1	1717	0.21758	3
PZP	0.030344	0.1277	1	1719	0.20813	4
MCCC2	0.030371	0.1277	1	1721	0.29476	5
FOS	0.030371	0.1277	1	1722	0.48584	4
C9orf163	0.030384	0.1277	1	1724	0.017877	3
TAS2R7	0.030401	0.1277	1	1725	0.09406	3
TSC22D4	0.030407	0.1277	1	1726	0.19358	4
RAB27A	0.030429	0.1277	1	1727	0.13174	4
IL7	0.030437	0.1277	1	1728	0.34416	6
C12orf43	0.030492	0.1277	1	1729	-0.59465	1
USP12	0.030546	0.1277	1	1730	-0.17893	2
KRTAP10-2	0.030551	0.1277	1	1731	0.29079	5
YBX1	0.030577	0.1277	1	1732	0.098894	3
PRR15	0.0306	0.1277	1	1734	-0.044275	3
ATF2	0.030626	0.1277	1	1735	-0.12462	3
KIAA1432	0.030645	0.1277	1	1737	0.18866	5
HOXA7	0.030654	0.1277	1	1738	-0.033271	3
NYX	0.030674	0.1277	1	1740	0.19279	5
PLAT	0.030703	0.1277	1	1743	0.23416	4
TMEM59L	0.030731	0.1277	1	1746	0.31898	5
SMR3A	0.030732	0.1277	1	1747	0.31009	4
hsa-mir-6127	0.054481	0.12786	1	2626	-1.0592	1
ARID5B	0.035558	0.12807	1	1927	-0.0065737	3
ZP1	0.035559	0.12807	1	1928	-0.1448	1
C1R	0.035633	0.12807	1	1946	0.086275	3
ODC1	0.035716	0.12807	1	1949	-0.5528	1
FNDC4	0.03573	0.12807	1	1950	-0.47513	2
DPYSL2	0.030744	0.12813	1	1748	0.25041	4
hsa-mir-1260b	0.037998	0.12861	1	2023	0.76459	3
CNNM2	0.030837	0.12882	1	1749	0.19285	4
TRIM16	0.03087	0.12882	1	1751	0.027444	3
RFPL4B	0.035875	0.12934	1	1955	-0.015525	3
NIPAL1	0.03603	0.12934	1	1958	0.17513	4
SAMD12	0.03614	0.13001	1	1960	0.31221	3
DEFB128	0.036183	0.13001	1	1962	0.018083	3
CTAG2	0.036313	0.13065	1	1967	-0.57834	2
DECR1	0.036332	0.13065	1	1968	-0.45558	2
MED30	0.038846	0.13089	1	2055	-0.85891	1
MT1F	0.038846	0.13089	1	2056	-0.15978	2
TCP10L2	0.036438	0.13134	1	1970	0.45157	5
DCTN1	0.03648	0.13134	1	1971	-0.6085	1
NFXL1	0.036547	0.13134	1	1972	-0.34608	2
PSMA8	0.036659	0.13134	1	1979	-0.26877	2
OPALIN	0.036678	0.13134	1	1980	0.26401	4
hsa-mir-10b	0.039403	0.13142	1	2082	0.29064	3
SALL1	0.039851	0.13142	1	2102	0.11273	4
hsa-mir-107	0.039919	0.13142	1	2103	-0.031379	2
hsa-mir-7706	0.053411	0.13192	1	2586	-0.25614	2
KLHL23	0.036839	0.13195	1	1988	-0.0066629	3
KRTAP3-1	0.037135	0.13195	1	1995	0.17888	4
FAM183A	0.037135	0.13195	1	1996	-0.079965	3
FREM1	0.037135	0.13195	1	1997	0.39177	3
CCT6A	0.037342	0.13195	1	2003	0.2709	3
LTBP1	0.0374	0.13195	1	2005	0.061895	4
SLC1A6	0.0374	0.13195	1	2006	-0.10631	2
SSUH2	0.0374	0.13195	1	2007	-0.42406	2
ISL1	0.037421	0.13195	1	2008	-0.33413	3
GPR33	0.037485	0.13195	1	2010	0.14674	3
LPAR6	0.037529	0.13195	1	2011	0.19049	4
ZXDA	0.037659	0.13195	1	2013	-0.044811	3
PTPRT	0.037961	0.13195	1	2021	-0.4824	2
SLC15A2	0.038051	0.13195	1	2024	-0.079136	3
OSGIN2	0.038152	0.13195	1	2030	0.049387	3
PARP3	0.038157	0.13195	1	2031	0.25875	4
LOC401052	0.038165	0.13195	1	2033	0.030656	3
hsa-mir-183	0.040102	0.13252	1	2109	-0.5645	1
STX10	0.040306	0.13252	1	2115	-0.31909	3
hsa-mir-155	0.040538	0.13253	1	2124	0.63014	2
PGLYRP2	0.038274	0.13259	1	2034	0.21914	5
ABCA6	0.038409	0.13259	1	2039	0.12227	4
ASXL1	0.038454	0.13259	1	2040	-0.52303	2
TBC1D10C	0.038507	0.13259	1	2043	0.3212	4
ZNF227	0.038586	0.13259	1	2046	0.20722	4
IP6K2	0.038654	0.13259	1	2048	-0.27458	2
SBF2	0.038895	0.13259	1	2057	0.14681	4
GJB3	0.038902	0.13259	1	2058	-0.056565	3
PRAMEF2	0.039035	0.13259	1	2062	0.11164	4
PLSCR1	0.030946	0.13264	1	1752	0.27455	4
MYO16	0.030979	0.13264	1	1753	-0.040693	3
TMEM38B	0.031034	0.13264	1	1757	-0.36543	2
PI4KB	0.031042	0.13264	1	1758	0.42144	4
SPATA9	0.031068	0.13264	1	1760	0.22799	4
TMEM56-RWDD3	0.10882	0.13277	1	4414	0.30782	1
hsa-mir-196a-2	0.040676	0.13307	1	2129	-0.50264	2
FAM86A	0.039108	0.13327	1	2067	0.27257	3
CD164	0.039126	0.13327	1	2068	-0.025775	3
DCBLD1	0.031108	0.13337	1	1761	0.34617	5
ITGB5	0.031135	0.13337	1	1762	0.15329	3
SLC25A17	0.031141	0.13337	1	1763	-0.08953	3
hsa-mir-4681	0.041081	0.13377	1	2142	0.54538	3
FBRSL1	0.031222	0.1338	1	1765	-0.42693	2
C3orf52	0.031223	0.1338	1	1766	0.21754	4
PCDHGA1	0.031303	0.1338	1	1769	-0.12856	2
C3orf37	0.031343	0.1338	1	1771	0.2082	5
PRM2	0.039171	0.13395	1	2069	-0.051088	3
WNT9B	0.039253	0.13395	1	2072	0.16453	3
ANGEL1	0.03926	0.13395	1	2073	0.10873	4
VTA1	0.039305	0.13395	1	2076	0.16314	4
FBXO15	0.039395	0.13395	1	2081	-0.49274	1
GOLGA6A	0.039439	0.13395	1	2084	-0.65364	1
GOLGA7	0.041192	0.13446	1	2146	-0.099896	3
KRTAP23-1	0.041286	0.13446	1	2150	-0.6006	2
SHC1	0.039484	0.13463	1	2090	0.22453	4
SORD	0.039569	0.13463	1	2093	-0.11583	3
HIF3A	0.039663	0.13463	1	2095	0.26325	5
PIGY	0.039832	0.13592	1	2101	-0.036133	3
FAM9A	0.04192	0.13641	1	2165	0.034167	3
TENM4	0.042002	0.13641	1	2171	-0.26705	2
ALX1	0.042125	0.13641	1	2176	-0.44989	2
HMCES	0.042182	0.13641	1	2178	-0.0069288	2
hsa-mir-6805	0.04245	0.13641	1	2189	0.54334	3
GIMD1	0.042462	0.13641	1	2191	-0.1858	2
RARG	0.042602	0.13641	1	2198	0.066121	3
LOC256021	0.042632	0.13641	1	2200	0.20366	3
FBLN7	0.042635	0.13641	1	2201	-0.48235	2
RHBDD3	0.042672	0.13641	1	2204	0.17732	4
HDAC9	0.042705	0.13641	1	2206	0.10165	3
BPY2	0.040077	0.13653	1	2107	0.1297	3
KCNK12	0.042898	0.137	1	2214	-0.85891	2
ZNF563	0.040225	0.13724	1	2112	0.13353	3
CDK3	0.04025	0.13724	1	2113	-0.40172	3
PIK3AP1	0.04029	0.13724	1	2114	-0.11836	2
SH2B3	0.040311	0.13724	1	2116	-0.17074	2
PROM2	0.040335	0.13724	1	2117	-0.38417	2
ERP27	0.040424	0.13724	1	2118	-0.36124	2
[truncated: 18,670 more rows]
